1 **Functional Anatomy, Biomechanical Performance Capabilities and Potential Niche of**  
2 **StW 573: an *Australopithecus* Skeleton (circa 3.67 Ma) From Sterkfontein Member 2,**  
3 **and its significance for The Last Common Ancestor of the African Apes and for Hominin**  
4 **Origins**

5 **Authors:**

6 Robin Huw Crompton<sup>a,b\*</sup>, Juliet McClymont<sup>c</sup>, Susannah Thorpe<sup>d</sup>, William Sellers<sup>e</sup>, Jason  
7 Heaton<sup>f,g</sup>, Travis Rayne Pickering<sup>g,h</sup>, Todd Pataky<sup>i</sup>, Dominic Stratford<sup>j</sup>, Kristian Carlson<sup>g,k</sup>,  
8 Tea Jashashvili<sup>g, l, m</sup>, Amélie Beaudet<sup>j,n</sup>, Laurent Bruxelles<sup>j,o,p</sup>, Colleen Goh<sup>q</sup>, Kathleen  
9 Kuman<sup>j</sup>, Ronald Clarke<sup>g</sup>

10

11 **\* corresponding author.**

12

13 **Affiliations:**

14 <sup>a</sup> *Department of Musculoskeletal Biology, Institute of Ageing and Chronic Disease,*  
15 *University of Liverpool, The William Henry Duncan Building, 6 West Derby Street, Liverpool*  
16 *L7 8TX, email: [rhcromp@liverpool.ac.uk](mailto:rhcromp@liverpool.ac.uk)\**

17 <sup>b</sup> *Department of Rheumatology, Aintree University NHS Trust, Liverpool L9 7AL, UK*

18 <sup>c</sup> *School of Health Sciences, Centre for Health Research, Aldro Building, University of*  
19 *Brighton, Eastbourne, United Kingdom, BN207UR*

20 <sup>d</sup> *School of Biosciences, University of Birmingham, Edgbaston, Birmingham, United*  
21 *Kingdom.*

22 <sup>e</sup> *School of Earth and Environmental Science, University of Manchester, Manchester, United*  
23 *Kingdom.*

24 <sup>f</sup> *Department of Biology, Birmingham-Southern College, Birmingham, Alabama, 35254,*  
25 *U.S.A.*

26 <sup>g</sup> *Evolutionary Studies Institute, University of the Witwatersrand, Johannesburg, South*  
27 *Africa, WITS 2050.*

<sup>1</sup> There is no universal agreement as to whether the separation of humans and their kin from great apes and their kin should be recognised at Family level (Hominidae) or Tribe level (Hominini) or Sub-Tribe level (Hominina). Contributors to this volume have agreed, while choosing their own term, to recognize that disagreement by inserting this footnote.

28 <sup>h</sup> *Department of Anthropology, University of Wisconsin Madison, 1180 Observatory Drive,*  
29 *Madison, Wisconsin, 53706, U.S.A.*

30 <sup>i</sup> *Department of Human and Health Sciences, Kyoto University, Kyoto, Japan*

31 <sup>j</sup> *School of Geography, Archaeology and Environmental Studies, University of*  
32 *Witwatersrand, WITS 2050, Johannesburg, South Africa*

33 <sup>k</sup> *Department of Integrative Anatomical Sciences, Keck School of Medicine, University of*  
34 *Southern California, Los Angeles, California 90033, U.S.A.*

35 <sup>l</sup> *Molecular Imaging Center, Department of Radiology, Keck School of Medicine, University*  
36 *of Southern California, Los Angeles, California 90033, U.S.A.*

37 <sup>m</sup> *Department of Geology and Paleontology, Georgian National Museum, Tbilisi 0105,*  
38 *Georgia*

39 <sup>n</sup> *Department of Anatomy, University of Pretoria, PO Box 2034, Pretoria 0001, South Africa*

40 <sup>o</sup> *French National Institute for Preventive Archaeological Research (INRAP), Nîmes, France*

41 <sup>p</sup> *French Institute of South Africa (IFAS), USR 3336 CNRS, Johannesburg 2001, South Africa*

42 <sup>q</sup> *Warwick Medical School, Coventry CV4 UK*

43

44 \*Corresponding author.

45 *E-mail address:* robinhuwcrompton@gmail.com

46

47 **Keywords:** *Australopithecus*; biomechanics; ecomorphology; ‘Little Foot’; locomotion;  
48 plasticity; Sterkfontein

49

50 **Abstract (300 words)**

51

52 StW 573, from Sterkfontein Member 2, dated ca 3.67 Ma, is by far the most complete  
53 skeleton of an australopith to date. Joint morphology is in many cases closely matched in  
54 available elements of *Australopithecus anamensis* (eg. proximal and distal tibial and humeral  
55 joint-surfaces) and there are also close similarities to features of the scapula, in particular , of  
56 KSD-VP-1/1 *A. afarensis* from Woranso-Mille. The closest similarities are, however, to the  
57 partial skeleton of StW 431 from Sterkfontein Member 4. When considered together, both  
58 StW 573 and StW 431 express an hip joint morphology quite distinct from that of *A.*  
59 *affricanus* Sts14, and a proximal femur of a presumed *A. affricanus* from Jacovec Cavern at  
60 Sterkfontein, StW 598. This, and other evidence presented herein, suggests there are two  
61 pelvic girdle morphs at Sterkfontein, supporting Clarke (2013) in his recognition of a second

62 species, *A. prometheus*, containing StW 573 and StW 431. StW 573 is the first hominid  
63 skeleton where limb proportions are known unequivocally. It demonstrates that some early  
64 hominins, at the time of formation of the Laetoli footprints (3.6 Ma), were large-bodied, with  
65 hindlimbs longer than forelimbs. Modelling studies on extant primates indicate that the  
66 intermembral index (IMI) of StW 573, low for a non-human great ape, would have  
67 substantially enhanced economy of bipedal walking over medium-to-long distances, but that  
68 it was still too high for effective walking while load-carrying. It would, however, have  
69 somewhat reduced the economy of horizontal climbing, but made *Gorilla*-like embracing of  
70 large tree-trunks less possible. Consideration of both ethnographic evidence from modern  
71 indigenous arboreal foragers and modern degeneracy theory cautions against prescriptive  
72 interpretations of hand- and foot-function, by confirming that both human-like upright  
73 bipedalism and functional capabilities of the hand and foot can be effective in short-distance  
74 arboreal locomotion.

75

## 76 **1. Introduction**

77

78 While it is now largely accepted that there was no phase of terrestrial knucklewalking in  
79 hominin evolution (see eg., Dainton and Macho, 1999; Dainton, 2001; Clarke, 2002; Kivell  
80 and Schmitt, 2009), and that australopiths show adaptations to both terrestrial bipedalism and  
81 arboreal locomotion, there is still no firm consensus on whether the ‘arboreal’ features of  
82 australopith postcrania would have been the subject of positive selection or were selectively  
83 neutral anachronisms (Ward 2002, 2013). The view that the two activities must be  
84 substantially mechanically incompatible is still current (see eg., Kappelman et al., 2016). The  
85 two alternative paradigms date from extended debates (see eg., Latimer, 1991 versus Stern  
86 and Susman, 1991) concerning the significance of the AL-288-1 ‘Lucy’ skeleton of  
87 *Australopithecus afarensis* in 1974. Although some one-third complete, this partial skeleton,  
88 and other more recently discovered partial australopith skeletons (eg., the Woranso-Mille  
89 *Australopithecus afarensis* skeleton, KSD-VP-1/1 ca. 3.6 Ma [Haile-Selassie et al. 2010]) and  
90 the Malapa *A. sediba* skeletons, MH-1 and MH-2, ca. 1.977 Ma [Berger, 2013]) are too  
91 incomplete to provide reliable upper and lower limb lengths, a crucial variable in assessing  
92 terrestrial and arboreal locomotor performance capabilities, and lack other auxiliary features  
93 which might offer a clear signal of the existence of selection for arboreal performance  
94 capabilities.

95

96 It has become increasingly clear, since the discovery of the foot bones of StW 573  
97 ('Little Foot') some 23 years ago (Clarke and Tobias, 1995), that the continued painstaking  
98 freeing of Little Foot's fragile bones from their matrix of hard breccia might for the first time  
99 provide unequivocal data on australopith postcranial anatomy. Some missing small skeletal  
100 elements may be recovered with further excavation, and some (such as the distal foot) were  
101 destroyed by lime mining a very long time ago, but at least 90% of the skeleton, complete  
102 enough for unequivocal knowledge of limb lengths, and with remarkably good preservation  
103 of joint surfaces and other vital detail has now been excavated and prepared (Clarke 2018,  
104 Figure 26). This completeness is unmatched until *Homo ergaster* KNM-WT 15000, at 1.5  
105 Ma. After much debate (see Bruxelles et al. 2018, submitted), the age of this specimen is now  
106 confidently set at ca 3.67 Ma, very close to the age of the Laetoli footprint trails (Leakey and  
107 Hay, 1979), which were previously our best source of information on the locomotor  
108 capabilities of australopiths. Now, StW 573 for the first time offers unequivocal information  
109 on limb proportions of forelimb and hindlimb.

110

111 Here we review aspects of contributions on StW 573 which bear on its potential niche  
112 as an individual. These aspects include the geological and palaeoenvironmental context  
113 (Bruxelles et al. 2018, submitted), its craniodental anatomy (Clarke and Kuman, 2018,  
114 submitted), the endocast (Beaudet et al., 2018a, in press), the inner ear (Beaudet et al. 2018b,  
115 submitted), the scapula and clavicle (Carlson et al., 2018, in prep.), the hand (Jashashvili et  
116 al., 2018 in prep.) and the foot (Deloison, 2004). Heaton et al. (2018, submitted) focus on  
117 statistical/morphometric descriptions of the longbones of StW 573 and comparisons with  
118 other species, and this paper is referred to where appropriate to avoid duplication. However,  
119 the present paper is quite distinct in its focus on: a) comparisons of those aspects of joint  
120 shape which in the literature are generally regarded as informative concerning locomotor  
121 function, and b) reconstruction of StW 573's potential ecological niche by proxy  
122 experiments and extant in-silico modelling. We adopt the hypothesis-based approach of  
123 Wainwright (1991) to species ecomorphology, which focuses on individual performance (and  
124 in this respect differs considerably from Bock and Von Wahlert's (eg. 1965) previous  
125 formulation which includes form, function and biological role but not performance, and is not  
126 therefore suited to experimental testing). This paper, and Heaton et al. (2018, submitted) are  
127 thus distinct in aims and methods, and while they refer to each other where appropriate and  
128 may indeed to be read in tandem as complementary/companion papers, they can equally

129 stand, and can be assessed, quite independently. In addition, we pay close attention to the  
130 significance of modern ecological dynamics theory, particularly plasticity (see eg. Neufuss et  
131 al. 2014); and neurobiological degeneracy (see eg. Edelman and Gally, 2001), for the  
132 cheiridia (hands and feet) in particular, which suggest that circumspection needs to be applied  
133 to functional interpretation of foot (see eg. Deloison, 2004) and hand morphology.  
134

135 Further, euhominoids (otherwise known as crown hominoids, so excluding eg.  
136 Proconsulidae, Pliopithecidae etc) display high levels of plasticity in muscle architecture: we  
137 have already noted that while DeSilva (2009) asserted that humans could not achieve the  
138 required dorsiflexion for chimpanzee-like vertical climbing, Venkataraman et al. (2013)  
139 showed that (presumably developmental) fibre-length plasticity enables some forest hunter-  
140 gatherers to do so, while neighbouring non-climbing populations cannot. Further, Neufuss et  
141 al. (2014) showed that while lemurs, like all primarily pronograde mammals studied to date,  
142 exhibit a dichotomy in axial musculature between deep slow contracting local stabilizer  
143 muscles and superficial fast contracting global mobilizers and stabilizers, hominoids, as  
144 previously shown for *Homo*, show no regionalization. Thus, it appears that hominoids have  
145 been under selective pressure to develop and sustain high functional versatility of the axial  
146 musculature, reflecting a wide range of mechanical demands on the trunk in orthograde.  
147 Neufuss et al. (2014). Using this analytical framework, focusing throughout on StW 573's  
148 individual locomotor performance capabilities, we hope to advance understanding of her  
149 biomechanical interaction with her environment and potential niche: her ecomorphology  
150 sensu Wainwright (1991).

151

152

153

## 154 **Background**

155

### 156 *2.1. The Sterkfontein Formation*

157

158 The Sterkfontein Formation is the world's longest succession documenting the  
159 evolution of hominins, fauna, landscape and ecology. Member 5 holds *Homo habilis* and  
160 *Homo ergaster*, *Paranthropus*, and evidence for over half a million years' evolution of early  
161 stone tool technologies. Member 4, dating to between at least 2.8 Ma. and 2.15 Ma, is the

162 richest *Australopithecus*-bearing deposit in the world and contains two species of  
163 *Australopithecus*, together with diverse and extensive faunal evidence. Four metres below,  
164 under the yet unexplored and extensive Member 3, which potentially documents a long  
165 period of evolution of *Australopithecus*, lies Member 2, which has yielded the world's most  
166 complete *Australopithecus* skeleton, StW 573, the only hominin found in this deposit.  
167 Member 2 formed around 3.67 Ma (Granger et al. 2015) based on isochron burial dating  
168 using cosmogenic aluminium-26 and beryllium-10. The detailed descriptions of the Member  
169 2 sedimentary units by Bruxelles et al. (2014, 2018 submitted) confirm the 3.67 Ma age of  
170 the skeleton published by Granger et al. (2015). Pickering and colleagues' recent (2018)  
171 repetition of a 2.8 Ma date fails to take into account, and fails to cite, Bruxelles and  
172 colleagues' (2014) demonstration that the flowstones are intrusive and dates for StW 573  
173 based on them thus invalid.

174

175           Importantly, taphonomic evidence (Clarke 2018 submitted; Bruxelles et al. 2018  
176 submitted) indicates that StW 573 died and was fossilized (below the ecological context in  
177 which she lived), from a fall into a steep cave shaft leading to an underground cavern. The  
178 skeleton is associated, in Member 2, with fauna dominated by cercopithecoids and carnivores  
179 (see section 2.4).

180

181

## 182           2.2     *The StW 573 partial skeleton*

183

184           The skeletal elements found to date are shown in assembly in Figure 26 of Clarke  
185 (2018, submitted). The skeleton offers, for the first time in one individual *Australopithecus*,  
186 complete (if deformed) skull and mandible, many vertebrae and ribs, a crushed pelvis and  
187 ischiopubic ramus, femora (broken but with overlapping morphology allowing confident  
188 length reconstruction), one intact and one slightly damaged but measurable tibia, partial left  
189 and right fibulae which overlap sufficiently to be sure of length and morphology, a partial  
190 foot (representing primarily the medial column) foot, two scapulae (one articulated with the  
191 upper limb), both clavicae (one partial and one complete), both humeri (one partially  
192 crushed), both radii and ulnae (one side near-intact and the other crushed and deformed most  
193 probably by a badly healed injury in-vivo), and finally one partial and one virtually complete  
194 hand (missing only one distal phalanx).

195

196 Their taphonomy and condition are discussed in detail in Clarke (2018, submitted)  
197 and the stratigraphic context in Bruxelles et al. (2018, submitted). StW 573's pelvis was  
198 substantially flattened post-mortem, but preservation of its margins is good enough to  
199 identify an obtuse greater sciatic notch angle (Figure 1 top) and hence suggest female sex. In  
200 contrast Figure 1 bottom shows the original reconstruction of the pelvis of StW 431 from  
201 Member 4, which appears closely similar but is indicative of a male from the acuteness of the  
202 greater sciatic notch. Lipping of the margins of the vertebral bodies of StW 573 (Figure 1,  
203 top) and heavy toothwear (Clarke et al., 2018, submitted), indicate that she was an old  
204 individual. StW 573 would have been some 130 cm in stature (RJC pers.comm. to RHC),  
205 which is some 10 cm. less than the average for modern Bolivian women, the world's shortest  
206 female population. By contrast, the stature of AL-288-1 would have been some 107 cm  
207 (Jungers, 1988). The considerable difference in stature is in accord with conclusions from the  
208 dimensions of the penecontemporaneous Laetoli footprints (both Deloison [1993, pp. 624-  
209 629], for Laetoli G and Masao et al. [2016] for the more extensive Laetoli S) that there was a  
210 large range in stature in early hominins. The slightly younger KSD-VP-1/1 partial skeleton  
211 confirms this conclusion for *A. afarensis*, to which it is referred.

212

### 213 2.3. Environmental Context

214

215 While based on the bovids, Vrba (1975) suggested a medium density woodland with a  
216 substantial open component, and based on the overall community of mammals, Reed (1997)  
217 similarly suggested open woodland with bush, However, most of the Sterkfontein Member 2  
218 fauna represent cercopithecoid or carnivore taxa which are today habitual climbers, and  
219 ancient gravels indicate a large, slow flowing river in the base of the valley (Pickering et al.,  
220 2004). Similarly, Elton et al. (2016) indicate that the cercopithecoids which are found in  
221 Member 2 were probably to some extent ecologically dependent upon trees for foraging,  
222 predator avoidance, or both. Thus, Pickering et al., (2004).suggest a paleohabitat of rocky  
223 hills covered in brush and scrub, but valley bottoms with riverine forest, swamp and standing  
224 water. Such a paleoenvironment might resemble that in today's Odzala-Koukoua National  
225 Park, Congo, where grassland, standing water and forest are interspersed (see eg.,  
226 <https://reefandrainforest.co.uk/news-item/trip-report-wildlife-republic-congo>. Member 4  
227 preserves a takin-like (and hence presumably also woodland) bovid *Makapania*, as well as  
228 large cercopithecoids (Pickering et al. 2004), which are associated with forest vines requiring  
229 large trees (Bamford, 1999), including one today known exclusively from central and

230 Western African tropical forest. This evidence suggests that little dessication occurred until  
231 Member 5 times. A carbon isotope study of faunal teeth by Luyt and Lee Thorpe (2003) also  
232 confirms that a drier, more open environment was only established by 1.7 Ma at Sterkfontein.

233

234

#### 235 2.4. *Species affinities*

236

237 There has been a long debate concerning the number of species within  
238 *Australopithecus* in South Africa, and particularly with relationship to the validity of  
239 *Australopithecus prometheus*. Grine (2013) feels that craniodental and some ancillary  
240 paleoenvironmental data are insufficient to justify splitting *A. africanus*, but Clarke (2013)  
241 presents craniodental and also postcranial evidence for species diversity at Sterkfontein. Of  
242 particular relevance here, he finds a distinction between *A. prometheus*, represented by, for  
243 example, the partial skeleton of StW 431 and the near-complete StW 573 skeleton and *A.*  
244 *africanus*, represented by Sts 14. Most of these discussions have focused on dental and  
245 gnathocranial evidence, but recent postcranial discoveries of postcrania have broadened the  
246 evidence base considerably, with particular attention now being paid to the pelvis and hip  
247 joint, which are crucial to both obstetric and locomotor evolution.

248

249 Thus, Figure 2 shows that the ilia of the Member 4 StW 431 and the Member 2 StW  
250 573 are closely similar in size and shape, even though the greater sciatic notches indicate that  
251 StW 573, with an obtuse notch, is most likely a female, and StW 431, with an acute notch, is  
252 apparently a male. By contrast, Figure 3 shows that the ilia of Sts14 and *A. afarensis* AL-288-  
253 1 -- from their obtuse greater sciatic notches both apparent females -- are substantially  
254 smaller. While Toussaint et al. (2003), who described StW 431, refer it to *A. africanus*, co-  
255 author Macho prefers attribution to *A. prometheus* (G.A.M. pers. comm. to RHC).  
256 Importantly, both the unreconstructed pelvis described by Toussaint et al. (2003) and the  
257 Kibii and Clarke (2003) reconstruction show that the acetabular margin is well preserved, and  
258 acetabular size well defined. Toussaint et al. (2003) note: ‘The acetabulum is clearly large: to  
259 judge by the preserved part, its vertical diameter would exceed 42 mm compared with 29.2  
260 mm in Sts 14’ (page 219).

261

262 Acetabular size is also large in StW 573, probably over 36 mm (Figure 4), although  
263 the acetabulum has been compressed by taphonomic events. Figures 5 and 6 show that not



264 only is the acetabulum large, but the StW 573 femoral head is a close match for the  
265 acetabulum of StW 431, while the head of the *A. africanus* proximal femur from Jacovec  
266 Cavern StW 598 is markedly smaller than the acetabulum of StW 431 or StW 573. The  
267 Jacovec Cavern proximal femur (StW 598) is, however, a good match for the acetabulum of  
268 Sts 14 (Figure 7 top left). That this reflects more than allometry is shown by the fact that the  
269 femur of *A. afarensis* also has a small head but lacks an obviously long femoral neck. We  
270 predict that other isolated material referable to *A. africanus* will similarly be found to have a  
271 long femoral neck. The StW 367 femur from Member 4 Sterkfontein shows a remarkable  
272 similarity to that of Jacovec StW 598 (Figure 7, top right). Thus both the small-bodied, long  
273 femoral neck/small femoral head morph (eg. Jacovec, StW 367) and the large-bodied, short  
274 femoral neck but large femoral head large hip joint morph (StW 431, StW 573) were present  
275 in both Member 2 and Member 4 times. The StW 573 femur resembles those of both humans  
276 and KNM WT 15000 (Figure 7, bottom) (and see Heaton et al. 2018, submitted, for  
277 morphometric detail). A large femoral head is commonly, and reasonably, associated with  
278 large forces operating across the hip joint and may be expected to correlate with body size.  
279 Femoral neck length, however, is likely related to the moment arm of the hip abductors (see  
280 eg. McHenry, 1975), but in what way, and with what iliac geometries, remains to be tested. It  
281 should be noted that a long femoral neck can prima facie be assumed to increase the risk of  
282 femoral neck fracture during instability events or falls, as it will increase the moment arm  
283 about the femoral neck from the impact or instability site. Stern (2000) is cited by Toussaint  
284 *et al.* (2003) in reference to the possibility that *A. afarensis* and *A. africanus* may have had a  
285 less effective abduction capacity in gluteus medius ‘thus compromising stabilization during  
286 walking’ (page 222). This could readily, and will be, tested in silico.

287

288         Fornai et al. (2018) recently reported that StW 431 also differs markedly from Sts 14  
289 in sacral shape, and, like ourselves, they suggest that functional morphs exist in South  
290 African *Australopithecus*. In this respect, it is interesting that Toussaint et al. (2003) noted  
291 very different body mass estimates for StW 431-- 42.5 kg using a hominoid RMA regression  
292 line, and 41.1 kg using a human regression line, but only 33.4 kg and 22.6 kg respectively on  
293 the basis of the lumbosacral region. There are clearly major biomechanical distinctions in the  
294 lumbosacral and hip regions, key for the effectiveness of upright walking, between  
295 universally recognised *A. africanus* (eg., Sts 14) and both StW 573 and StW 431. Not all of  
296 them can be put down to a simple relationship to body size – although body size itself is a  
297 major difference. Since a palaeospecies is identified by morphological (and one would hope,

298 functional) distance, we argue that the balance of evidence is now strongly in favor of broad  
299 recognition of *A. prometheus* as a species distinct from *A. africanus*.

300

301

302

### 303 2.5 Cranial and Dental Anatomy and Diet

304

305 An overall cranial shape similarity is evident with the Bouri Hata hominin, ca. 2.5  
306 Ma, (Asfaw et al. 1999), but some aspects of cranial morphology suggest to Clarke and  
307 Kuman (2018, submitted) that an ancestral relationship of StW 573 to *Paranthropus* may be  
308 possible. Beaudet et al. (2018a, in press) conclude from the remarkably well preserved  
309 endocast that the brain was small (perhaps surprisingly so) and undistinguished from that of  
310 other non-human great apes (NHGAs).

311 Although it will take some time for the mandible to be detached safely from the  
312 cranium, microCT scanning has revealed that wear distribution as well as dental arcade shape  
313 resemble those of Kanapoi *A. anamensis*, 4.17-4.12 Ma., where Ward *et al.* (2001, p. 351)  
314 found that the ‘teeth exhibit a distinctive pattern of wear. Evident in older individuals, the  
315 anterior teeth are worn very heavily, much more so than the molars and premolars.’ Ward et  
316 al. (2001) cite evidence that *A. anamensis* was taking a tough C4 diet, which might suggest  
317 open environments. But faunal analysis suggested to Reed (1997) that Kanapoi  
318 paleoenvironments at the time of *A. anamensis* were closed woodland. However,  
319 Behrensmeyer and Reed (2013) note that other evidence, including stable isotopes, possibly  
320 non-arboreal monkeys and micromammals, and characteristics of paleosols, suggest that open  
321 habitats also existed. Similarly, Cerling et al. (2013) found that ( $\delta^{13}\text{C}$ ) stable isotopes in  
322 dental enamel of *A. anamensis* suggest a C3-dominated diet (leaves and fruits from trees and  
323 shrubs, etc.). Further, comparative evidence from extant colobines (Koyabu and Endo, 2010)  
324 indicates that similar wear distribution may result from consumption of tough-skinned  
325 arboreal fruit. Of course consumption of tough-coated arboreal fruit and consumption of  
326 tough-coated terrestrial resources (such as corms and tubers) are not mutually exclusive. The  
327 Woranso-Mille hominin KSD-VP-1/1, now dated to some 3.6 Ma (Haile-Selassie, 2016) and  
328 attributed to *A. afarensis*, also appears from faunal evidence to have occupied a primarily  
329 wooded environment (Su, 2016), with browsers dominant and grazers a relatively small  
330 component, but with some aquatic species, such as crocodiles and an otter, *Torolutra*,

331 suggesting that the locality samples a riverbank community.  $\delta^{13}\text{C}$  determinations from *A.*  
332 *afarensis* at Woranso-Mille suggest a balance of C3 and C4 items in diet (Wynn et al., 2013;  
333 Levin et al., 2015), but microwear (Ungar et al. 2010) closely resembles that in *A.*  
334 *anamensis*.

335  
336

### 337 **3. Functional Interpretation**

338

339 As noted above, morphometric and general anatomical descriptions of StW 573 long bones  
340 are provided by Heaton et al. (2018, submitted); of the scapula by Carlson et al. (2018, in  
341 prep.), of the hand by Jashashvili et al. (2018, in prep.), and the foot by Deloison (2004).  
342 Detailed descriptions and morphometrics should be sought therein, as here we restrict our  
343 attention to the significance of the postcranial anatomy of StW 573 for locomotor ecology of  
344 early hominins. We focus our comparative attention primarily on *A. anamensis* from Kanapoi  
345 and KSD-VP-1/1, as they bracket StW 573 in time and are of similar size. StW 431 is  
346 younger than StW 573, but we regard this specimen as conspecific. Some comparisons will  
347 be made to Sts 14 and AL-288-1, but these specimens are considerably smaller and they are  
348 more likely to be adaptively different, quite possibly being (in the case of Sts 14 at least)  
349 more arboreal. We do not refer extensively to the considerably later *A. sediba*. As noted by  
350 Lovejoy et al. (2016), its forelimb seems curiously derived towards some kind of suspensory  
351 locomotion and/or feeding, and its hindlimbs are not reliably reconstructed, the lower limb  
352 length having been assumed by Berger (eg. 2013) to equal that of proximal and distal  
353 fragments plus the length of the empty matrix between them in situ, despite the likelihood  
354 that taphonomic events would affect such an indirect length estimate. We make broad  
355 comparisons to the well preserved skeleton of *Homo ergaster*, KNM WT 15000 (Walker and  
356 Leakey, 1993), ca 1.5 Mya., as appropriate.

357

#### 358 *3.1. Thorax and Pectoral Girdle*

359 The ribs and vertebral column are currently under study by our team but it appears  
360 that the thoracic inlet is narrow, unlike the penecontemporaneous KSD-VP-1/1. This does not  
361 support the generalization of Lovejoy *et al.* (2016) from KSD-VP-1/1 that early hominins had  
362 abandoned the superiorly narrow ribcage typical of NHGAs. On the other hand, the clavicles  
363 (Figure 9 top) are broadly humanlike in form, and indeed remarkably long, very similar to

364 those in the much taller KNM WT 15000 *Homo ergaster*. The right clavicle is complete  
365 (Figure 9 top). Like that of KNM WT 15000 (Figure 9 bottom), it is delicate, with a clear S  
366 shape very similar to that exhibited by humans. The strong sigmoid curvatures would  
367 increase moment arm for potential stabilizers of the shoulder girdle against the humerus, such  
368 as the clavicular head of the pectoralis major, the deltoid, and pectoralis minor. The most  
369 remarkable feature, however, is the length: 14 cm, in an early human ancestor estimated to be  
370 ca. 130 cm in stature (RJC pers. comm. to RHC). This clavicular length equals typical means  
371 for adult humans worldwide (Trinkaus et al., 2014) and is in striking contrast with the short  
372 clavicle of *A. sediba* MH2 as reported by Schmid et al. (2013).

373         Given the likely close relationship of the male StW 431 to StW 573, we virtually  
374 bisected the reconstructed articulated os innominatum and sacrum through the sacral midline  
375 and mirrored it. The bi-iliac width of the reconstructed StW 431 pelvis (Fig. 1, bottom) was  
376 thus estimated at 30 cm. Given the dimensional similarities between the StW 573a and StW  
377 431 pelvises, the bi-iliac breadth of StW 573 cannot have been much less than the 30 cm. bi-  
378 iliac distance in StW 431, which compares to mean values in modern human females of  
379 around 28 cm. (see eg. Simpson et al., 2008). Since StW 573's clavicle was 14 cm long, and  
380 assuming some 3 cm inter-clavicular distance (we lack a sternum), her bi-acromial distance  
381 would have been some 28-30 cm, very similar to the likely bi-iliac breadth, suggesting that  
382 the trunk was more or less of equal width superiorly and inferiorly, unlike the ribcage. This  
383 mismatch between a narrow thoracic inlet and broad shoulders suggests the latter was the  
384 subject of active selection for large moments at the glenohumeral joint, and hence powerful  
385 climbing. A preliminary canonical variates plot of scapular geometry by Carlson et al. (2018,  
386 in prep.) based on MicroCT and virtual reconstruction of the shattered scapular blade shows  
387 that StW 573 occupies a position very close to MH2 *A. sediba*, but also close to KSD-VP-  
388 1/1, *Gorilla* and *Pongo*. However, plots for *Pan* and *Homo* (particularly KNM-WT 15000)  
389 lie quite distant from StW 573, at the left and right extremes of the plot. The glenoid fossa is  
390 certainly more cranially oriented than in *Homo*. Either way, the geometry of the pectoral  
391 girdle of *A. prometheus* does not seem to resemble the 'shrugged' girdle proposed by  
392 Churchill et al. (2013) for *A. sediba*. Weak expression of the mastoid process on the skull of  
393 StW 573 (Figure 10) indicates that the sternocleidomastoid was by no means as powerful as  
394 would be expected with such a 'shrugged' posture. Indeed, the distinction between the short  
395 clavicle of *A. sediba* (1.97 Ma) and the long clavicle of the much earlier *A. prometheus* (3.67  
396 Ma) suggests that any elevated pectoral girdle posture in *A. sediba* is derived, not ancestral as

397 claimed by Churchill et al. (2013). Following Rein et al. (2017), we must consider whether  
398 suspensory performance was selected for in *A. sediba*, possibly in connection with postural  
399 feeding adaptations.

400

### 401 3.2 Arm

402

403 The right humerus is crushed but intact. It is articulated proximally with the scapula  
404 and distally with the radius and ulna. The head of the detached left humerus is crushed and so  
405 the size of the deltoid tuberosity cannot be assessed. Muscle markings are moderately strong,  
406 particularly the intact brachioradialis crest (Figure 10 top), which appears substantially larger  
407 than the damaged crest in KSD-VP-1/1b figured by Lovejoy et al. (2016). This implies more  
408 power in pronation in StW 573 (which hypothesis again can be tested in silico). The distal  
409 humeral condyles (Figure 10 bottom) appear very similar in form to those of the Kanapoi *A.*  
410 *anamensis* KNM-KP 271, figured by Hill and Ward (2018) in having, for example, a more  
411 salient lateral margin for the trochlear articulation than KNM WT 15000 (Figure 11). This  
412 feature might imply less axial ‘rocking’ of the ulna than occurs in our genus, but as Lovejoy  
413 and colleagues (2016) note, these distinctions are not so major as to necessarily imply active  
414 selection. And, as Hill and Ward (1988) note, distal humeral morphology is very variable in  
415 humans. Further, Hill and Ward (1988) comment that the Kanapoi distal humerus shows a  
416 clear fracture and needs to be considered with caution.

417

418 With regard to the ulna, the shape of the StW 573 trochlear notch agrees more closely  
419 with the human ulna figured in Lovejoy *et al.* (2016) than with either KSD-VP-1/1 or AL-  
420 288-1 in its somewhat less anterior orientation. Following those authors, we refrain from  
421 functional interpretation at this moment. Shaft curvature appears more marked than that  
422 figured by Lovejoy et al. (2016) for KSD-VP-1/1, but it appears from Drapeau et al. (2005)  
423 that curvature is variable in early hominins. There is no radius for KSD-VP-1/1, but that of  
424 the Kanapoi *A. anamensis*, as figured by Ward et al. (2001), is both similar in morphology  
425 and near-identical in length to that of StW 573. Retention of such a long radius (see section  
426 3.5, *Limb proportions*), especially in combination with a relatively powerful brachioradialis,  
427 implies power in flexed/pronated elbow postures, most likely employed during climbing.

428

### 429 3.3. Pelvic girdle

430           The os innominatum of both StW 573 and StW 431 corresponds broadly with the  
431 form shown by Lovejoy et al. (2016, Fig 8.21) for *A. afarensis*, with both a greater sciatic  
432 notch and anterior inferior iliac spine evident, although the latter has sheared off in StW 573.  
433 We need not refer further to the pelvic girdle until the crushed pelvis of StW 573 has been  
434 restored by retrodeformation. Hence most information is drawn from StW 431 (see Toussaint  
435 et al., 2002 and Kibii and Clarke, 2003). However, we should note that as Kozma et al.  
436 (2018, p. 1) pithily conclude from a study of hip extensor mechanics, ‘*Ardipithecus* was  
437 capable of nearly human-like hip extension during bipedal walking, but retained the capacity  
438 for powerful, ape-like hip extension during vertical climbing. Hip extension capability was  
439 essentially human-like in *Australopithecus afarensis* and *Australopithecus africanus*,  
440 suggesting an economical walking gait but reduced mechanical advantage for powered hip  
441 extension during climbing.’ Contra Lovejoy et al. (2016) who unequivocally attribute a short  
442 ischium in *Homo* to running, Kozma et al. (2018) demonstrate that a short ischium greatly  
443 enhances distance travelled for energy consumed in walking. But it is worth noting that  
444 musculoskeletal modelling by some of us (Goh et al., 2017) showed that in terms of joint  
445 moments and torques exerted by all major lower limb extrinsic muscles, the ability of gorillas  
446 to walk bipedally is not limited by their adaptations for quadrupedalism and vertical  
447 climbing.

448

449

#### 450 3.4 Femur, Tibia, Hip, Knee and Ankle

451

452           We have noted that the femoral head of StW 573 is large, and the femoral neck is  
453 short compared to *A. africanus* sensu stricto (e.g., the proximal femur from Jacovec Cavern  
454 StW 598 [Partridge et al., 2003]) and *A. afarensis* AL-288-1. In that respect it resembles  
455 KNM-WT 15000 more closely. Unfortunately, there is as yet no proximal femur for the more  
456 size and age-matched *A. afarensis* KSD-VP-1/1. The left distal femur of *A. afarensis* KSD-  
457 VP-1/1 is poorly preserved, especially the medial condyle, but Lovejoy et al. (2016) report  
458 that the (restored) lateral condyle is ‘elliptical’, and like StW 573, the patellar groove is deep  
459 and shows a high lateral wall for patellar retention, as noted by Heaton et al. (2018,  
460 submitted).

461

462           However, the lateral femoral condyle of StW 573 (Figure 12) is not only posteriorly  
463 ‘elliptical’ (to use Lovejoy and colleagues’ [2016] term), but more specifically like humans,

464 has a relatively rounded posterior/dorsal section and flat anterior/ventral section. Again like  
465 humans, the medial femoral condyle is more evenly rounded dorsoventrally (Figure 13). The  
466 knee of KSD-VP-1/1 does, as Lovejoy et al. (2016) state, appear to show a valgus angle (see  
467 their Figures 8.6 and 8.6). But it is, like that of StW 573 (Figure 14) more weakly marked  
468 than in KNM-WT 15000 and particularly than in AL-288-1 (Stern and Susman 1983), where,  
469 taken at face value, the angle probably reaches an extreme among hominins.

470

471         There is detailed evidence of the morphology of the proximal surface of the *A.*  
472 *anamensis* tibia from Kanapoi KNM-KP 29285A, 4.16 Ma (reviewed in Ward et al., 2001),  
473 which is shown in Figure 15 as a visualization of an stl file (open source, from:  
474 africanfossils.org. XYZ dimensions 68.00; 103.30; 60.66 mm.). Ligamentous and muscular  
475 attachments are detailed, but although preservation of StW 573 and KNM WT 15000 is  
476 excellent, these are not identifiable with any confidence in either specimen (Figure 16 top and  
477 bottom). The tibia of KSD-VP-1/1 is heavily damaged throughout and the proximal surface  
478 carries little information. From Figures 17, 18 and 19, it is clear that KNM-KP 29285A, StW  
479 573 and KNM WT 15000 all have long, concave condyles on the medial side, and short, less  
480 concave condyles on the lateral side, which in KNM-WT 15000 and StW 573 are matched by  
481 a long rounded section on the medial femoral condyle but an anteriorly flatter lateral condyle.  
482 This is the bony basis of the ‘locking’ or ‘screw-home’ mechanism of the knee (see eg. Dye,  
483 1987 and Lovejoy, 2007). The condyles and cruciate ligaments form a four-bar linkage. In  
484 knee extension, because of the flatter condylar morphology of the ventral part of the lateral  
485 condyles, they cease sagittal rotation motion before the medial condyle, and rollback occurs,  
486 compressing the lateral meniscus and further immobilizing the lateral condyle so that a  
487 passive coronal rotation results, spiralizing fibres in the cruciate ligaments and stabilizing the  
488 knee. This allows standing with minimal expenditure of muscular energy for balance and  
489 signifies that early hominins from 4.16 Ma onwards (including both *A. anamensis* and *A.*  
490 *prometheus*) were able to stand upright with enhanced efficiency. ARA VP1/701  
491 *Ardipithecus ramidus* lacks most of the femur, and curiously, the nearly complete tibia is  
492 largely unreported (see eg. White et al., 2009), so we cannot assess whether *Ar. ramidus* had  
493 this important mechanism, despite Lovejoy’s reference to his own (2007) paper discussing  
494 the so-called ‘screw-home’ mechanism reviewed above. But as might be expected the  
495 associated distal femoral condyle asymmetry is evident in the morphology of the AL-288-1  
496 distal femur, 3.4 Ma (Figure 20) (and see Stern and Susman, 1983 and Lovejoy, 2007).

497 In upright arboreal bipedalism, some of us have shown experimentally (Johannsen et  
498 al., 2017) that ‘light touch’ with the fingers on supports between shoulder and waist height  
499 significantly enhances balance on unstable supports and reduces thigh muscle activity  
500 required to counteract perturbation by some 30%. *Ar. ramidus* could have used this  
501 mechanism in upright bipedal walking in the trees, and thus it could have been an effective  
502 upright arboreal biped. The same applies to *Pierolapithecus* (12.5-13 Ma, Moyà-Solà et al.,  
503 2004).

504

505 Lovejoy et al. (2016) draw attention to the short radius of curvature in the talar joint  
506 surface of the distal tibia KSD-VP-1/1, , versus the flatter talar joint surface in NHGAs  
507 (DeSilva, 2009). Figure 21 shows that the radius of curvature is as short in StW 573 as it is  
508 in KNM-WT 15000, and a similarly short radius of curvature can be seen in Figure 22 (an stl  
509 model of Kanapoi distal right tibia KNMKP 29285, downloaded from [open source] [www.africanfossils.org](http://www.africanfossils.org),  
510 Dimensions: x=40.16; y=97.82; z=40.50 mm). Ward *et al.* (2001) note  
511 that the maximum concavity of that Kanapoi talar joint surface/plafond is 5 mm. In StW 573  
512 it is ca 4.5 mm, and in KNM-WT 15000 (depending on side) it is also ca 4.5 mm. In each  
513 case the shape of the talar joint surface is square, rather than rectangular as tends to be the  
514 case in NHGAs.

515

516 DeSilva (2009) claimed that the human ankle joint was incapable of dorsiflexion to  
517 the extent required for ‘chimpanzee-like’ vertical climbing, and this view has been widely  
518 taken on board, particularly by Lovejoy et al. (e.g., 2016). However, Venkataraman et al.  
519 (2013a) showed that Twa hunter-gatherers can indeed achieve high ankle dorsiflexion, and  
520 engage in vertical climbing since they tend to have longer fibers in the gastrocnemius muscle  
521 than neighbouring, non-climbing agricultural communities. The latter is an excellent example  
522 of the importance of plasticity - the ability to adapt musculoskeletal anatomy during  
523 development to enhance function in the realized niche - to all great apes, including humans,  
524 to which we shall return later.

525 StW 573, KNM-WT15000 and Kanapoi *A. anamensis* thus appear to have very  
526 similar proximal and distal tibial morphology, which strongly suggests similarity in function.  
527 However, isolated and species-unidentified specimens from Sterkfontein Member 4 often  
528 show rather variable morphology. The Member 4 specimen StW 514 assumed to be *A.*  
529 *africanus* by Berger and Tobias (1996), however, combines an *A. anamensis*-like distal tibial



530 condyle (StW 514b) with a proximal condyle (StW 514a), which Berger and Tobias (1996)  
531 claimed had distinctly more convex condyles than *A. afarensis*. Organ and Ward (2006),  
532 however, found no difference in lateral tibial condyle geometry between StW 514a and *A.*  
533 *afarensis*, and the debate concerning whether, and to what extent, Member 4 australopiths  
534 developed a wider range of locomotor adaptations continues. The case of the peculiar  
535 pectoral girdle adaptations of *A. sediba* from Malapa, for example (Churchill et al., 2013) is  
536 strong evidence that some South African species may have adopted unique modes of postural  
537 feeding.

538

539

### 540 3.5. Limb proportions

541

542 Figure 23 shows the long bones of the upper and lower limbs of StW 573 compared.  
543 At a likely 130 cm tall (RJC pers. comm. to RHC), she was some 10 cm shorter than the  
544 average for modern Bolivian women, but some 23 cm taller than AL-288-1 Lucy (106.68 cm  
545 according to Jungers, 1988). She was a little shorter than *A. afarensis* KSD-VP-1/1, by the  
546 margin which might be expected in a female. Her left humerus' maximum length is 29 cm;  
547 her radius is 24.4 cm long (RJC pers. comm. to RHC), almost identical to the length of the *A.*  
548 *anamensis* radius from Allia Bay, East Turkana, KNM-ER 20419, which it also resembles  
549 closely in its (conservative) morphology. Her ulna was 26.3 cm. long. Her total arm length  
550 (humerus plus radius) was 53.4 cm. Her femora would have been 33 cm in length, 28.5 for  
551 the tibia, giving a total leg length of 61.5 cm (RJC, pers. comm. to RHC and see Heaton *et*  
552 *al.*, 2018 submitted). Thus it is no longer a subject for debate whether some early hominids,  
553 living at about the time the Laetoli G and S trails were laid down, had hindlimbs that were as  
554 long or longer than their forelimbs. StW 573 is the first hominin fossil in which this is  
555 unequivocal.

556

557 These values give an intermembral index of 86.8 (ratio of  $h + r$  L to  $f + t$ ). Other  
558 indices are discussed in Heaton *et al.* (2018 submitted). This is outside and above the human  
559 range as reported by Schultz (1937) at 64.5-78, but below that of *Gorilla* at 110-125, that of  
560 *Pongo* at 135-150.9, and that of *Pan* at 100.4-100.5, but clearly much closer to the human  
561 range than that of the other great apes. The range in *Pan* is so narrow compared to all other  
562 great apes as to suggest it is under strong selective control, most likely very tight tuning for

563 effectiveness in quadrupedalism (see Isler *et al.* 2006). Indeed Drapeau and Ward (2007)  
564 note that the proportions of the forelimb in *Pan* are highly derived.

565

566

567

## 568 **4. Discussion**

569

### 570 4.1 Ecomorphology: Testable Hypotheses on Potential Niche

571

572 Bock and von Wahlert's (1965) classic paper, 'Adaptation and the Form-Function Complex,'

573 stressed form, function and biological role. It inspired a generation, some to explore

574 biological role by field studies in the natural environment, and others to pursue analyses of

575 the biomechanics of living primates held in captivity. Despite this, it may fairly be said to

576 have had relatively little influence in changing methodology in hominin paleontology, where

577 morphometrics – now most often geometric morphometrics -- continues to dominate research

578 activity, although the introduction of biomechanical modelling techniques such as Finite

579 Elements Stress Analysis and Dynamic Modelling, has been pursued by a (growing)

580 minority. In our view, a newer ecological formulation that is hypothesis- and experiment-

581 driven would be greatly beneficial. This was provided by Wainwright's (1991)

582 'Ecomorphology: Experimental Functional Anatomy for Ecological Problems'. It updates

583 Bock and Von Wahlert (1965) in its focus on performance, and specifically performance of

584 the individual, which is vital because it is the reproductive success of the individual which

585 drives adaptation at population and species levels. Wainwright (1991, p. 680) says:

586 'morphology influences ecology by limiting the ability of the individual to perform key tasks

587 in its daily life. In this scheme the effect of morphological variation on behavioral

588 performance is first tested in laboratory experiments. As the behavioral capability of an

589 individual defines the range of ecological resources that it can potentially make use of (the

590 potential niche), the second step in the scheme involves comparing the potential niche of an

591 individual to actual patterns of resource use (the realized niche)'. Those of us who study

592 fossils can rarely carry out 'laboratory experiments on the effect of morphological variation

593 on behavioural performance' (p. 680), but increasingly, we can do so in silico, using custom-

594 designed-and-written software. This is usually open-source, such as OpenSim

595 (<http://opensim.stanford.edu/work/index.html>) and co-author Sellers' GaitSym

596 ([www.animalsimulation.org](http://www.animalsimulation.org)). The latter has been specifically written for comparative, not

597 human biomechanics, and for palaeontology. Another approach is experimentation using  
598 human proxies: we have cited one such study, Johanssen et al. (2017), which tested the effect  
599 of light touch on stabilization of the body on unstable supports in a visual simulation of  
600 rainforest environments. Similarly, we have just reported that upper limb lengths were short  
601 in StW 573 compared to the NHGAs. This suggests less ability to embrace large supports,  
602 and particularly, shorter reach, which we hypothesize to reduce the energetic efficiency of  
603 arboreal locomotion. Halsey et al. (2017) measured the impact of variation in morphology  
604 and locomotor behaviour on the rate of oxygen consumption of 19 elite male parkour athletes  
605 as they repeatedly traversed an arboreal-like assault course of 103 m horizontal length. The  
606 course consisted of a range of generic gymnasium apparatus such as vaulting horses, raised  
607 blocks, high bars, wall bars, and areas filled with loose foam blocks to emulate the range of  
608 mechanical conditions present in an arboreal pathway, rather than the exact structure of the  
609 forest canopy. Thus, parts of the course incorporated support compliance, irregularity and  
610 discontinuity to reflect the conditions experienced during gap crossing between tree crowns,  
611 while others were rigid and predicated to reflect the phases between bouts of gap crossing  
612 when even large-bodied apes may walk into and out of the core of a tree along thick boughs.  
613 They found familiarity with the course had a substantial effect on reducing energetic costs,  
614 but there was no evidence to suggest that the locomotor behavior profile of each individual  
615 (or the combination of locomotor behaviors that they selected between first and last trials)  
616 influenced their ability to attenuate costs. We must therefore, presume more subtle  
617 mechanical adjustments are being made to attenuate locomotor challenges. Importantly,  
618 athletes with longer arm spans and shorter legs were particularly able to find energetic  
619 economies. Thus, our hypothesis that shorter reach would reduce the efficiency of arboreal  
620 locomotion is confirmed for one hominin at least, namely *Homo sapiens*. Therefore based on  
621 this analogy we conclude that the limb proportions of StW 573 would have reduced her  
622 energetic efficiency in arboreal climbing.

623

624 A second hypothesis would then be that her long legs and shorter arms would have  
625 increased her distance-specific effectiveness in bipedalism. While we have commenced in-  
626 silico modelling of StW 573 using sophisticated forwards dynamics modelling under  
627 GaitSym, successful fully 3D modelling inevitably takes a great deal of iterative computation,  
628 and thus time. However, previous studies of other hominins and of the biomechanical  
629 consequences of their body and limb proportions provide strong indications of likely  
630 findings. Wang and Crompton (2003, Figure 3), using mass and stature estimates from the

631 literature, found that dimensionless power, mass and stature are closely related, and that  
632 humans have arrived at a better combination of these parameters for long distance bipedalism  
633 than KNM WT 15000, AL-333 and SK 82. However, as shown by Wang and Crompton  
634 (2003, Figure 3) all these fossils occupy a considerably more optimal place on a 3D plot of  
635 dimensionless power, mass and stature than for example AL-288-1, OH 62 (a supposed  
636 *Homo habilis*—Johanson et al., 1987, but see Clarke, 2017 for a view contra) and Sts 14.  
637 Given her estimated stature (130 cm), StW 573 would occupy a position closer to KNM-WT  
638 15000 and AL-333 than to Sts 14, OH 62 and AL-288-1. Thus, our second hypothesis is  
639 confirmed by analogy: that StW 573's distance-specific effectiveness in bipedalism would be  
640 enhanced by her longer legs.

641  
642 On the other hand, following the calculations of Wang et al. (2003), StW 573's intermembral  
643 index of 86.8, outside the human range and larger than that of KNM-WT15000, would not  
644 have allowed her to hand-carry loads more than the weight of the upper limb without losing  
645 swing symmetry. This contrasts with their estimate that KNM-WT 15000 could effectively  
646 carry loads of three times the weight of the upper limb while maintaining swing symmetry.  
647 Interestingly, chimpanzees proved unable to hand-carry loads at all without losing swing  
648 symmetry, which is interesting in the light of data showing manuports used by chimpanzees  
649 in cracking *Panda oleosa* nuts in the Tai forest are carried no more than 10-15 m (Profitt et  
650 al., 2018). Similarly, but using inverse dynamics and shoulder-borne loads, Wang and  
651 Crompton (2004) showed that, for the given body proportions, KNM-WT 15000 could carry  
652 loads of 10-15% body mass for no greater mechanical cost than AL-288-1 would incur  
653 walking upright but unloaded. StW 573 would, we predict, function better in this regard than  
654 AL-288-1, but by no means as well as KNM-WT 15000. This strongly suggests that her  
655 performance capabilities balanced distance-specific terrestrial effectiveness against retention  
656 of efficiency in arboreal climbing.

657  
658 These hypotheses need to be tested, and currently are being tested for StW 573, using  
659 forwards dynamic modelling. Again, we can use this technique to discover what advantage  
660 would have been delivered to StW 573 by her short femoral neck, given her substantial pelvic  
661 flare. Further, as suggested above, given her more cranially oriented glenoid fossa and  
662 scapular form (similar to that of *Gorilla* as well as *A. sediba* and KSD-VP-1/1), but her long  
663 clavicles (very unlike *A. sediba*) we can use dynamic modelling of her own unique pectoral  
664 girdle and pectoral limb architecture to explore the power that she could exert in moderately

665 elevated glenohumeral postures. Thus we will assess the hypothesis that her large  
666 brachioradialis flange (suggesting a semiflexed/semipronated elbow posture) would  
667 maximize flexor power. This would facilitate climbing on narrow diameter tree trunks and  
668 vines with similar kinematics to that recorded for modern human indigenous arboreal  
669 foragers, particularly when using hallucal grasping.

#### 670 4.1. *Implications of ecological dynamics for functional capabilities of hands and feet*

671

672 Ecological dynamics seeks to explain coordination and control processes in  
673 movement systems during performance of complex multi-articular tasks. This is ner more  
674 obvious than during grasping and stepping where multiple rows of bones each form multiple  
675 joints controlled by many ligaments and tendons (see Seifert et al., 2016). Here, the hands  
676 and feet are interacting directly with the environment and with technology.

677 The ability of anatomically and morphologically complex organs to adapt efficiently  
678 to changes in the environment is driven by the evolutionary mechanism of neurobiological  
679 degeneracy. This is the ability of biological elements that are structurally different to perform  
680 similar functional outputs (Edelman, 1987). It is quite different to the common engineering  
681 concept of redundancy, which refers to the duplication or repetition of similar shaped  
682 elements to provide alternative functional outputs in times of mechanical failure (Bernstein,  
683 1967). Therefore multiple means of achieving the same or different functions (according to  
684 ecological context) exist by recruitment of structurally different elements. Neurobiological  
685 degeneracy ‘is a prominent property of gene networks, neural networks, and evolution itself’  
686 (Edelman and Gally, 2001, p. 13763).

687

688 Further, euhominoids/crown hominoids (i.e., Hominidea excluding *eg.* Proconsulidae,  
689 Pliopithecidae etc.) display high levels of plasticity in muscle architecture. Venkataraman et  
690 al. (2013) showed that (presumably developmental) fibre-length plasticity enables some  
691 human forest hunter-gatherers to dorsiflex the ankle to the extent required for chimpanzee-  
692 like vertical climbing, while neighbouring non-climbing populations cannot. Further,  
693 Neufuss et al. (2014) showed that while lemurs, like all primarily pronograde mammals  
694 studied to date, exhibit a dichotomy in axial musculature between deep slow contracting  
695 local stabilizer muscles and superficial fast contracting global mobilizers and stabilizers,  
696 hominoids, as previously shown for *Homo*, show no regionalization. Thus, it appears that  
697 hominoids have been under selective pressure to develop and sustain high functional  
698 versatility of the axial musculature, reflecting a wide range of mechanical demands on the

699 trunk in orthograde. Neufuss et al. (2014) suggest that this is a derived characteristic acquired  
700 by early euhominoids. Most likely, this characteristic was acquired by euhominoids such as  
701 *Morotopithecus*, or at least *Pierolapithecus*.

702

703 Thus, locomotor flexibility is a characteristic of the euhominoid/crown hominoid  
704 clade. But in individuals, degeneracy not only stabilizes under perturbation as in light touch  
705 (see eg. Johanssen et al. 2017), but helps individuals exhibit adaptability. Multiple  
706 alternative recruitment patterns exist in the motor control system, and are variously selected  
707 by the CNS (central nervous system) in each grasp or step, as the CNS seeks to optimize  
708 performance. It results in functional intra-individual movement variability (Seifert et al.,  
709 2014). Thus, it is unsurprising that high intra- and inter-subject variability in human foot  
710 pressure cannot be characterized reliably by less than 400 step trials (McClymont 2016;  
711 McClymont and Crompton, submitted ms.). Such variability is a natural product of a  
712 degenerate system so that, for example, even in small samples, peak midfoot pressures  
713 overlap in human, bonobo and orang-utan populations (Bates et al., 2013). Further,  
714 prehensive capabilities of the human foot need to be assessed in the context of the greater  
715 abduction of the hallux known for many years to exist in habitual barefoot walkers such as  
716 Hoffman's (1905) indigenous forest foragers (and see D'Août et al., 2009). Indigenous human  
717 arboreal gatherers such as the Ba'aka, Twa and Batek have the ability to climb small vines  
718 using a hallucal grasp (see eg. Figure 25), as observed by Kraft et al. (2014), and equally that  
719 of Western adults with reduced pollical capabilities or no pollex to substitute skilled hallucal  
720 grasping. Figure 26 illustrates the refined grasp that can be performed by the hallux of some  
721 such individuals. The latter, in particular, is an excellent demonstration of how  
722 neurobiological degeneracy allows the foot to perform the many fine locomotor skills we  
723 tend to associate with the hand. Figure 27 demonstrates that parkour athletes can perform  
724 brachiation on an I-beam (here demonstrating the range of plasticity which exists in human  
725 finger capabilities, in performing behaviors we normally associate with gibbons and NHGAs,

726 The relative proportions of the thumb and fingers of StW 573 (Figure 28) are modern-  
727 human-like (Clarke, 1999), as is the case with the *A. afarensis* hand from AL 333 and AL  
728 333w, according to Alba et al. (2003). This suggests that modern human-like hand  
729 proportions, as well as grasping capacities (Clarke, 1999, 2002) had their origins in arboreal  
730 behaviour before they were exploited in more terrestrial hominins for tool-use. Clarke (2002)  
731 notes that no stone tools have been found in Member 2, and there is no suggestion that StW

732 573 made stone tools. On the contrary, Little Foot's hand bears a salient apical ridge on the  
733 trapezium, a feature commonly present, and marked, in living gorillas (Figure 29). This might  
734 have reduced effectiveness of deep, soft opposition (for discussions of prehension see eg.  
735 Marzke et al., 1997, and Tocheri et al., 2008).

736 Trapezium morphology is highly variable in primates (Napier and Davis, 1959;  
737 Hellier and Jeffery, 2006), so care must be taken in interpretation, but it is likely that this  
738 structure, absent in humans, might help brace the thumb and its ulnar and radial  
739 carpometacarpal and metacarpophalangeal collateral ligaments against forced abduction,  
740 similar to 'gamekeeper's thumb' which tends to affect skiers who fall on their hand while still  
741 grasping their poles, or football (soccer) goalkeepers who fall while holding a football  
742 (Glickel, Barron and Eaton, 1999). In gorillas, the apical ridge might therefore stabilize the  
743 pollex in abducted pinch grips during climbing, and we suggest that the case would be the  
744 same in StW 573.

745

746 Available footbones of StW 573 have been discussed in detail by Clarke (1998,  
747 2002), Clarke and Tobias (1995) and Deloison (2004). Proportions and general morphology  
748 broadly resemble those from Woranso-Mille (Haile-Selassie et al., 2012) and Dikika  
749 (DeSilva et al., 2018), and the high functional plasticity of the human hallux discussed above  
750 must be taken into account in any discussion of hallucal function. Human feet as a whole are  
751 highly plastic and functionally degenerate, and as shown by Venkataraman et al. (2013b)  
752 and Kraft et al. (2014), they are perfectly capable of functioning efficiently in climbing as  
753 well as terrestrial bipedal walking and running, having unquestionably retained a prehensile  
754 (if relatively adducted) hallux (see e.g. Figures 25 and 26), contra Holowka and Lieberman  
755 (2018). The high human death rates from falls from trees of less than 20 m. quoted by  
756 Venkataraman et al. (2013b) are a clear indication that, even were plasticity and degeneracy  
757 insufficient, selection would certainly favour retention of hallucal prehension in any human  
758 population engaging in barefoot climbing (common in human childhood). It is also highly  
759 pertinent to this discussion that analyses of the Laetoli G1 and G2 footprint trails, both of  
760 which were formed by hominins penecontemporaneous with StW 573 and KSD-VP-1/1,  
761 show that only for very small areas of the foot can external function be statistically  
762 distinguished from those made by Holocene human pastoralists and Western humans  
763 (McClymont, 2016; McClymont and Crompton submitted ms.). This indicates that the  
764 external function of the foot during terrestrial bipedal walking has changed very little since

765 the time of StW 573. Preliminary studies by Raichlen and Gordon (2017) for the new Laetoli  
766 S trails are in agreement with this conclusion.

767

768

769 *4.2 Significance of StW 573 for Hominin origins and the Last Common Ancestor of*  
770 *African Apes*

771 In summaries of the findings in the 2009 special issue of *Science* on *Ardipithecus*  
772 *ramidus*, Lovejoy (p. 74e1) claims ‘*Ar. ramidus* was already well-adapted to bipedality, even  
773 though it retained arboreal capabilities. Its postcranial anatomy reveals that locomotion in the  
774 chimpanzee/human last common ancestor (hereafter the CLCA) must have retained  
775 generalized above-branch quadrupedality, never relying sufficiently on suspension, vertical  
776 climbing, or knuckle walking to have elicited any musculoskeletal adaptations to these  
777 behaviors.’ While we agree strongly with Lovejoy’s (2009) view, expressed elsewhere in the  
778 same paper, that the human/chimpanzee ancestor was not chimpanzee-like, at least in  
779 postcranial morphology, we differ with his conclusion that the *Pan/Homo* LCA must have  
780 retained ‘generalized above-branch quadrupedality’. *Pan*’s forelimb morphology is highly  
781 derived (Drapeau and Ward, 2007) and its intermembral index optimized for quadrupedalism  
782 (Isler et al., 2006). Why should the LCA not have been a ‘well-adapted’ arboreal biped as  
783 some of us (eg. Crompton et al. 2010) have suggested from field data on *Pongo* and *Gorilla*  
784 locomotion? The work of Johanssen et al. (2017) demonstrates clearly that humans retain  
785 neural mechanisms for fast response to perturbation in bipedalism on narrow, unstable  
786 supports via light touch with the fingers. These would be completely incompatible with a  
787 hand loaded in quadrupedal posture.

788 The skeletal similarity of StW 573 to KSD-VP 1/1 and particularly *A. anamensis*, and  
789 evidence for a similar diet to the latter -- substantially C3 foods -- suggests that these  
790 hominins had a similar potential niche. It further suggests that the contemporaneous Laetoli G  
791 and S trails were made by a very similar hominin which combined continued, if uniquely  
792 hominin, modes of arboreal foraging -- in mesic environments -- with effective terrestrial  
793 bipedalism. While Ward et al. (2001) concluded that *A. anamensis* was very largely  
794 terrestrial, they made a point of not ruling out a substantial arboreal component in its ecology.  
795 The postcranial evidence shows that selection was operating on *A. prometheus* to retain  
796 considerable arboreal competence: from limb proportions, through the long radius shared  
797 with *A. anamensis*, (as indicated by the KNM-ER 20419 Sibilot radius from Allia Bay [see



798 Ward et al. 2001]) to the apical ridge on the trapezium. Indeed the retention of an inner-ear  
799 mechanism suited for motion in a complex, 3D environment demonstrated by Beaudet et al.  
800 (2018b, submitted) is clear endorsement of the interpretation of a substantially arboreal  
801 habitus for *Au. prometheus*. We are thus now able to confirm that the apparent ‘arboreal’  
802 features of early hominins were indeed the subject of positive selection, not selectively  
803 neutral anachronisms (see Ward 2002, 2013).

804 Frequent skeletal similarities of the StW 573 postcranium (e.g., the scapula) to  
805 *Gorilla gorilla*, lacking in *Pan*, suggest availability of a similar potential niche, but with  
806 reduced use, compared to *Gorilla*, of large tree trunks and increased use of vines and small  
807 treetrunks, as noted by Venkataraman *et al.* (2013b) for living human arboreal foragers. Thus  
808 we differ also with White et al. (2009, p. 64) in their scenario, which places *Gorilla* on an  
809 ‘adaptive pedestal’ separated from australopiths by the chimpanzees, which suggests  
810 unidirectional evolution of hominin locomotion. *Pan* is biomechanically highly derived. It is  
811 clear that effective arboreal, as well as terrestrial, foraging, albeit less effective than in  
812 NHGAs due to adaptations for increased terrestrial effectiveness, were part of the australopith  
813 niche and, given locomotor plasticity and degeneracy, remain part of the potential niche of  
814 *Homo sapiens* (Kraft et al., 2014).

815

## 816 **5. Conclusions**

817 Following Wainwright’s (1991) formulation of ecomorphology, we predict that StW  
818 573’s potential niche was exploitation of both arboreal and terrestrial resources, facilitated by  
819 plasticity and degeneracy. Toothwear and postcranial similarities to *A. anamensis* suggest a  
820 similar primarily C3 diet in mesic mixed forest/grassland. This might include fibrous tubers  
821 on the ground and at water margins, as well as tough-skinned arboreal fruit. StW 573 was an  
822 effective arboreal biped and climber which had, however, sacrificed some arboreal  
823 effectiveness in favour of enhanced energetic efficiency in walking medium to long distances  
824 on the ground. She would not have been as effective when load carrying, unlike *Homo*  
825 *ergaster*. Her locomotor posture was upright bipedalism, whether on the ground or on  
826 branches, and she was able to stand upright without much muscular activity because of a  
827 ‘locking’ or ‘screw-home’ mechanism in the knee which does not seem to have been present  
828 in *Ar. ramidus*. *A. anamensis* and KSD-VP-1/1 probably shared a similar niche. However, we  
829 require new fieldwork on lowland gorilla arboreality to establish how the realized niche of *A.*

830 *prometheus*, *A. anamensis* and *Ar. ramidus* in arboreal foraging might have differed from that  
831 of *Gorilla*, accompanied by in-silico testing of locomotor hypotheses concerning early  
832 hominin performance capabilities.

833

## 834 **Acknowledgements**

835

836 This paper was written under an Emeritus Fellowship EM-2017-010 from The  
837 Leverhulme Trust to RHC, whose wider research in hominin biology has been primarily  
838 funded by The UK Natural Environment Research Foundation and The Leverhulme Trust.

839 Major funding for the Sterkfontein excavations and MicroCT scanning work have  
840 been provided by National Research Foundation grants to KK (#82591 and 82611) and to DS  
841 (#98808) and by the Palaeontological Scientific Trust (PAST), without whose support this  
842 research would not have been able to continue. We particularly thank Andrea Leenen and  
843 Rob Blumenschine for their help in securing major corporate funding, including sustained  
844 support from Standard Bank and JP Morgan.

845 RHC thanks Matt Lotter, Matt Caruana and Kristiaan D'Aout for photographic  
846 assistance, and Sarah Elton for her kind advice and support of this special issue. Scans of  
847 *Australopithecus anamensis* come from open source: [www.africanfossils.org](http://www.africanfossils.org). The authors  
848 have no competing interests to declare.

849 **RHC and JMC dedicate their contribution to the memory of their close friend**  
850 **and colleague, Russ Savage.**

851

852

853

## 854 **References**

855

856 Alba, D.M., Moyà-Solà, S., Köhler, M., 2003. Morphological affinities of the  
857 *Australopithecus afarensis* hand on the basis of manual proportions and relative  
858 thumb length. *J. Hum. Evol.* 44, 225-254

859 Asfaw, B., White, T., Lovejoy, O., Latimer, B., Simpson, S. and Suwa, G., 1999.

860 *Australopithecus garhi*: a new species of early hominid from  
861 Ethiopia. *Science*, 284.629-635.

862 Bamford, M. 1999 Pliocene fossil woods from an early hominid cave deposit, Sterkfontein,  
863 South Africa. *South African Journal of Science* 95, 231-237

- 864 Bates, K.T., Collins, D., Savage, R., McClymont, J., Webster, E., Pataky, T.C., D'Août, K.,  
865 Sellers, W.I., Bennett, M.R. and Crompton, R.H., 2013. The evolution of compliance  
866 in the human lateral mid-foot. *Proceedings of the Royal Society B*, 280 (1769), p.  
867 20131818.
- 868 Berger, L., 2013 The Mosaic Nature of *Australopithecus sediba*. *Science* 340, 163.
- 869 Beaudet, A., Clarke, R.J., de Jager, E.J., Bruxelles, L., Carlson, K.J., Crompton, R., de Beer,  
870 F., Dhaene, J., Heaton, J.L., Jakata, K., Jashashvili, T., Kuman, K., McClymont, J.,  
871 Pickering, T.R., Stratford, D. 2018 a The endocast of StW 573 ("Little Foot") and  
872 hominin brain evolution *Journal of Human Evolution*, in press.
- 873 Beaudet, A., Clarke, R.J., Bruxelles, L., Carlson, K.J., Crompton, R., de Beer, F., Dhaene,  
874 J., Heaton, J.L., Jakata, K., Jashashvili, T., Kuman, K., McClymont, J., Pickering,  
875 T.R., Stratford, D. 2018b. The bony labyrinth of StW 573: implications
- 876 Behrensmeier A. K., Reed, K.E. 2013 Reconstructing the Habitats of *Australopithecus*:  
877 Paleoenvironments, Site Taphonomy, and Faunas In Reed, K.E., Fleagle, J.G. and  
878 Leakey, R.E.F. (Eds.) *The Paleobiology of Australopithecus*.  
879 Dordrecht: Springer pp. 41-60
- 880 Bernstein, N. 1967 The co-ordination and regulation of movements. Oxford: Pergamon.
- 881 Bock, W.J. and Wahlert, G., 1965. Adaptation and the form function complex.  
882 *Evolution*, 19(3), 269-299
- 883 Berger, L.R. and Tobias, P.V., 1996. A chimpanzee-like tibia from Sterkfontein, South Africa  
884 and its implications for the interpretation of bipedalism in  
885 *Australopithecus africanus*. *Journal of Human Evolution*, 30(4), 343-348.
- 886 Bruxelles, L., Clarke, R.J., Maire, R., Ortega, R. and Stratford, D., 2014.  
887 Stratigraphic analysis of the Sterkfontein StW 573 *Australopithecus skeleton* and  
888 implications for its age. *Journal of Human Evolution*, 70, 36-48.
- 889 Carlson, K.J., Green, D., Jashashvili, T., Pickering, T.R. Heaton, J.L., Beaudet, A.  
890 Crompton, R., Kuman, K. Bruxelles, L. McClymont, J. Stratford, D. Clarke R.J..2018  
891 The pectoral girdle of StW 573 (Little Foot) and its implications for hominin  
892 evolution. *Journal of Human Evolution*, submitted,
- 893 Cerling, T.E., Manthi, F.K., Mbua, E.N., Leakey, L.N., Leakey, M.G., Leakey, R.E., Brown,  
894 F.H., Grine, F.E., Hart, J.A., Kaleme, P. and Roche, H., 2013. Stable isotope-based  
895 diet reconstructions of Turkana Basin hominins. *Proceedings of the National*  
896 *Academy of Sciences*, 110(26), 10501-10506.
- 897 Churchill, S.E., Holliday, T.W., Carlson, K.J., Jashashvili, T., Macias, M.E., Mathews, S.,

- 898 Sparling, T.L., Schmid, P., de Ruiter, D.J. and Berger, L.R., 2013. The upper limb  
899 .of *Australopithecus sediba*. *Science*, 340(6129), 1233477-1.-5
- 900 Clarke, R.J. and Tobias, P.V., 1995. Sterkfontein Member 2 foot bones of the  
901 oldest South African hominid. *Science*, 269 (5223), 521-524.
- 902 Clarke, R.J., 1998. Discovery of complete arm and hand of the 3.3 million-  
903 year-old *Australopithecus* skeleton from Sterkfontein.  
904 *South African Journal of Science*, 95(11/12), 477-480.
- 905 Clarke, R.J., 2002. Newly revealed information on the Sterkfontein Member 2  
906 *Australopithecus* skeleton: news & views.  
907 *South African Journal of Science*, 98(11-12), 523-526.
- 908 Clarke, R.J. 2013 *Australopithecus* from Sterkfontein Caves, South Africa.  
909 In: Reed, K.E., Fleagle, J.G., Leakey, R.E.F. (Eds.)  
910 *The Paleobiology of Australopithecus*, Dordrecht:  
911 Springer pp. 105-123.
- 912 Clarke, R.J. 2017. *Homo habilis*: the inside story. In Sahnouni M., Semaw, S., Garaizar, J.R.  
913 (Eds.), *Proceedings of the Iith. Meeting of African Prehistory*. Centro Nacional de  
914 Investigación sobre la Evolución Humana, Burgos (Spain), pp. 25-51.
- 915 Clarke, R.J. 2018, submitted. Excavation, reconstruction and taphonomy of the StW 573  
916 *Australopithecus* skeleton from Sterkfontein Caves, South Africa. *Journal of Human*  
917 *Evolution*, submitted.
- 918 Clarke, R.J., Kuman, K. 2018, submitted. The skull of StW 573, a ca 3.67 Ma  
919 *Australopithecus* skeleton from Sterkfontein Caves, South Africa. *Journal of Human*  
920 *Evolution*.
- 921 Crompton, R.H., Sellers, W.I., Thorpe, S.K.S. 2010. Arboreality, terrestriality and  
922 bipedalism. *Philosophical Transactions of the Royal Society, Series B* 365, 3301-  
923 3315.
- 924 Dainton, M., Macho, G.A. 1999 Did knuckle walking evolve twice?  
925 *Journal of Human Evolution* 36, 171–194.  
926
- 927 Dainton, M., 2001. Did our ancestors knuckle-walk? *Nature* 410, 324–325.  
928
- 929 Deloison Y., 2004. A New Hypothesis on the Origin of Hominoid Locomotion.  
930 In: Meldrum D.J., Hilton C.E. (Eds.) *From Biped to Strider*.  
931 Boston, MA: Springer, pp. 35-48.
- 932 Deloison, Y., 1993. Etude des restes fossiles des pieds des premiers hominides:  
933 *Australopithecus* et *Homo habilis*. *Essai d'interpretation de leur mode de*

- 934 locomotion. These de Doctorat D'Etat es Sciences Naturelles, L'Universite Rene  
935 Descates, Paris V.
- 936 D'Août, K., Pataky, T.C, De Clercq, D., and Aerts, P., 2009, The effects of habitual  
937 footwear use: foot shape and function in native barefoot walkers.  
938 Footwear Science Vol. 1, No. 2, 81–94.
- 939 Deloison, Y. 2004 A New Hypothesis on the Origin of Hominoid Locomotion.  
940 In: Meldrum D.J., Hilton, C.E.(Eds.) From Biped to Strider  
941 Hominidés), Kluwer Academic/Plenum Press, New York pp. 35-47.
- 942 DeSilva, J.M., 2009. Functional morphology of the ankle and the likelihood of climbing  
943 in early hominins. Proceedings of the National Academy of Sciences of the USA  
944 106(16): 6567–6572.
- 945 DeSilva, J.M. , Gill, G.M, Prang,T.C. , Bredella, M.A. , Alemseged, Z. 2018 A nearly  
946 complete foot from Dikika, Ethiopia and its implications for the ontogeny and  
947 function of *Australopithecus afarensis*. Science Advances: 4 (7) eaar7723, 1-8.
- 948 Drapeau, M.S.M., Ward, C.V. 2007 Forelimb segment length proportions  
949 in extant hominoids and *Australopithecus afarensis*.  
950 American Journal of Physical Anthropology 132, 327–343.
- 951 Dye, S.F. 1987 An evolutionary perspective of the knee. The Journal of Bone and Joint  
952 Surgery (American Volume) 69 (7), 976-983.
- 953 Edelman, G.M. and Gally, J.A., 2001. Degeneracy and complexity in biological  
954 systems. Proceedings of the National Academy of Sciences, 98(24), pp.13763-13768.
- 955 Elton, S., Jansson, A-U., Meloro, C., Louys,J. Plummers, T., Bishop, L.C. 2016  
956 Exploring morphological generality in the Old World monkey postcranium using an  
957 Ecomorphological framework. Journal of Anatomy. 228, 534--560
- 958 Fornai, C., Krenn, V.A., Nueesch, M. Haeusler, M., (2018). Unexpectedly high  
959 morphological variability in the *Australopithecus* sacrum. Implications for sexual  
960 and taxonomic diversity. Proceedings of the European Society for the study of  
961 Human Evolution, 67.
- 962 Glickel, S.Z. Baron, O.A. Eaton, R.G. (1999) Dislocations and ligament injuries in the  
963 digits. In: Green, D.P., Hotchkiss, M., Pederson, W.C. (Eds.) Green's Operative  
964 Hand Surgery, Fourth edition, Volume 1, p.p 772-808.  
965 Philadelphia: Churchill Livingstone.
- 966 Goh, C., Blanchard, M.L., Crompton, R.H., Gunther, M.M., Macaulay, S., Bates, K.T (2017)  
967 A 3D musculoskeletal model of the western lowland gorilla hind limb: moment arms

- 968 and torque of the hip, knee and ankle. *Journal of Anatomy* 231, 568--584
- 969 Granger, D.E., Gibbon, R.J., Kuman, K., Clarke, R.J., Bruxelles, L. and Caffee, M.W.,  
970 2015. New cosmogenic burial ages for Sterkfontein Member 2 *Australopithecus* and  
971 Member 5 Oldowan. *Nature*, 522 (7554), 85-88.
- 972 Grine F.E. 2013 The Alpha Taxonomy of *Australopithecus africanus*. In: Reed, K.E., Fleagle,  
973 J.G., Leakey, R.E.F. (Eds.) *The Paleobiology of Australopithecus*, Dordrecht:  
974 Springer pp. 73-104.
- 975 Haile-Selassie, Y., Latimer, B.M., Alene, M., Deino, A.L., Gibert, L., Melillo, S.M.,  
976 Saylor, B.Z., Scott, G.R. and Lovejoy, C.O., 2010. An early *Australopithecus*  
977 *afarensis* postcranium from Woranso-Mille, Ethiopia. *Proceedings of the National*  
978 *Academy of Sciences*, 107(27), 12121-12126.
- 979 Haile-Selassie, Y., Saylor, B.Z., Deino, A., Levin, N.E., Alene, M., Latimer, B.M.  
980 2012 A new hominin foot from Ethiopia shows multiple Pliocene bipedal  
981 adaptations. *Nature* 483, 565–569.
- 982 Halsey L. G., Coward, S. R. L., Crompton R. H., Thorpe S. K. S., 2017  
983 Practice makes perfect: Performance optimisation in ‘arboreal’ parkour athletes  
984 illuminates the evolutionary ecology of great ape anatomy  
985 *Journal of Human Evolution* 103, 45-52.
- 986 Heaton, J.L. Pickering T.R., Beaudet, A., Clarke, R.J., Bruxelles, L., Carlson, K.J.,  
987 Crompton, R., Stratford, D.T., Kuman, K., McClymont, J., Jashashvili, T., 2018 The  
988 Long Limb Bones of the StW 573 *Australopithecus* Skeleton from Sterkfontein  
989 Member 2: Descriptions and Proportions. *Journal of Human Evolution*, submitted.
- 990 Hellier, C. A. , Jeffery, N. 2006 Morphological plasticity in the juvenile talus.  
991 *Foot and Ankle Surgery* 12, 139-147.
- 992 Hill, A., Ward, S., (1988). Origin of the Hominidae: The Record of African Large  
993 Hominoid Evolution Between 14 My and 4 My. *Yearbook of Physical Anthropology*  
994 31, 49-83.
- 995 Hoffmann, P. 1905 Conclusions drawn from a comparative study of the feet of barefooted  
996 and shoe-wearing peoples. *The Journal of Bone and Joint Surgery* s2-3, 105-136.
- 997 Holowka, N.B., Leiberman, D.L. (2018) Rethinking the evolution of the huamn foot: insights  
998 From experimental research. *Journal of experimental biology* 221, jeb174425.1-12
- 999 Isler, K., Payne, R.C., Günther, M.M., Thorpe, S.K., Li, Y., Savage, R. and Crompton, R.H.,  
1000 2006. Inertial properties of hominoid limb segments. *Journal of Anatomy*, 209(2),  
1001 201-218.

- 1002 Jashashvili, T. , Carlson, K.J., Heaton, J.L. Pickering T.R., Beaudet, A., Clarke,  
1003 R.J.,,,Bruxelles, L., McClymont, J., .. Crompton, R., Stratford, D.T., Kuman, K.,  
1004 2018 Hand of StW 573 (“Little Foot”) Journal of Human Evolution, submitted
- 1005 Johanssen, L. Coward, S. R. L., Martin, G. R., Wing, A. M., van Casteren, A., Sellers, W. I.  
1006 Ennos, A. R., Crompton, R. H., Thorpe, S. K. S., 2017 Human bipedal instability in  
1007 tree canopy environments is reduced by “light touch” fingertip support  
1008 Nature Scientific Reports 7:1135, 1- 12.
- 1009 Johanson, D.C., Masao, F.T., Eck, G.G., White, T.D., Walter, R.C., Kimbel, W.H., Asfaw, B.,  
1010 Manega, P., Ndessokia, P. Sua, G., 1987. New partial skeleton of *Homo habilis* from  
1011 Olduvai Gorge, Tanzania. Nature 327, 205-209.
- 1012 Jungers, W., 1988 Lucy’s Length : Stature Reconstruction in *Australopithecus*  
1013 *afarensis* (A.L.288-1) With Implications for Other Small-Bodied Hominids  
1014 American Journal of Physical Anthropology 76, 227-231
- 1015 Kappelman, J., Ketcham, R.A., Pearce, S. Todd, L., Atkins, W., Colbert, M.W.,  
1016 Feseha, M., Maisano, J.A., Witzel, A. 2016. Perimortem fractures in Lucy  
1017 Suggest mortality from fall out of tall tree. Nature 537, 504- 507.
- 1018 Kibii, J.M. and Clarke, R.J., 2003. A reconstruction of the Stw 431 *Australopithecus*  
1019 pelvis based on newly discovered fragments: news and views. South African Journal  
1020 of Science, 99(5-6), 225-226.
- 1021 Kivell, T.L. and Schmitt, D., 2009. Independent evolution of knuckle-walking in  
1022 African apes shows that humans did not evolve from a knuckle-walking ancestor.  
1023 Proceedings of the National Academy of Sciences, 106(34), 14241-14246.
- 1024 Kozma E.E., Webb, N.M., Harcourt-Smith, W.E.H., Raichlen, D.R., D’Aout, K., Brown,  
1025 M.H., Finestone, E.M. , Ross, S.R., Aerts, P., Pontzer, H. 2018 Hip extensor  
1026 mechanics and the evolution of walking and climbing capabilities in humans, apes,  
1027 and fossil hominins DOI:[10.1073/pnas.1715120115](https://doi.org/10.1073/pnas.1715120115)
- 1028 Koyabu, D.B. and Endo, H., 2010. Craniodental mechanics and diet in Asian colobines:  
1029 morphological evidence of mature seed predation and sclerocarpy.  
1030 American Journal of Physical Anthropology, 142(1), 137-148.
- 1031 Kraft, T.S., Venkataraman, V.V. and Dominy, N.J., 2014. A natural history of human  
1032 Tree climbing. Journal of Human Evolution, 71, 105-118.
- 1033 Latimer, B. 1991 Locomotor adaptations in *Australopithecus afarensis*: the issue of  
1034 arboreality. In: Senut B, Coppens, Y. (Eds.) Origine(s) de la bipédie chez les  
1035 Hominidés), CNRS, Paris pp. 169–176.

- 1036 Leakey, M.G., Feibel, C. S., McDougall, I., Walker, A. 1995.  
1037 New four-million-year-old hominid species from Kanapoi and Allia Bay, Kenya.  
1038 *Nature* 376, 565–571.
- 1039 Leakey, M.G., Feibel, C. S., McDougall, I., Ward, C. V., Walker, A. 1998  
1040 New specimens and confirmation of an early age for  
1041 *Australopithecus anamensis*. *Nature* 363, 62–66.
- 1042 Leakey, M.G., Hay, R.L., 1979. Pliocene footprints in the Laetolil Beds at Laetoli, northern  
1043 Tanzania. *Nature* 278, 317-323.
- 1044 Levin, N.E., Haile-Selassie, Y., Frost, S.R., & Saylor, B.Z. 2015  
1045 Dietary change among hominins and cercopithecids in Ethiopia  
1046 during the early Pliocene. *Proceedings of the National Academy of Sciences*,  
1047 112, 12304–12309.
- 1048 Lovejoy, C.O., Latimer, B.M., Spurlock, L, Haile-Selassie, Y. 2016  
1049 The Pelvic Girdle and Limb Bones of KSD/VP/1-1. Ethiopia In: Haile-Selassie Y,  
1050 Su, D.F. (Eds.) *The Postcranial Anatomy of Australopithecus afarensis:*  
1051 *New Insights from KSD-VP-1/1*. Dordrecht: Springer pp. 155-177.
- 1052 Lovejoy, C.O. Simpson, S.W., White, T.D., Asfaw, B. Suwa G.(2009) Careful Climbing  
1053 in the Miocene: The Forelimbs of *Ardipithecus ramidus* and Humans Are Primitive  
1054 *Science* 326 (5949),70, 1-8.
- 1055 Luyt, C.J., Lee-Thorp, J.A., 2003. Carbon isotope ratios of Sterkfontein fossils indicate a  
1056 marked shift to open environments c. 1.7 Myr ago. *South African Journal of*  
1057 *Science* 99, 271-273.
- 1058 Marzke, M.W., 1997. Precision grips, hand morphology, and tools.  
1059 *American Journal of Physical Anthropology*, 102(1),91-110.
- 1060 Masao, F.T., Ichumbaki E.B., Cherin, M., Barili, A., Boschian, G., Iurino, D.A.,  
1061 Menconero, S., Moggi-Cecchi, J., Manzi, G. 2016 New footprints from Laetoli  
1062 (Tanzania) provide evidence for marked body size variation in early hominins  
1063 *eLife* 2016;5:e19568. DOI: 10.7554/eLife.19568
- 1064 McClymont, J. 2017. Foot Pressure Variability and Locomotor Plasticity in Hominins  
1065 Thesis submitted in accordance with the requirements of the University of Liverpool  
1066 for the degree of Doctor of Philosophy
- 1067 McClymont, J., Crompton, R.H. Locomotor plasticity in hominins:  
1068 From the ground, up? Submitted Manuscript
- 1069 McHenry, H.M., 1975. Biomechanical interpretation of the early hominid hip.



- 1070 Journal of Human Evolution 4(5) 343-355.
- 1071 Moyà-Solà, S.; Köhler, M.; Alba, D. M.; Casanovas-Vilar, I.; Galindo, J. 2004
- 1072 *Pierolapithecus catalaunicus*, a New Middle Miocene Great Ape from
- 1073 Spain. Science 306 (5700): 1339–1344.
- 1074 Napier, J. R. Davis, P. R. 1959 The fore-limb skeleton and associated remains of *Proconsul*
- 1075 *africanus*. London: British Museum (Natural History),
- 1076 Neufuss, J., Hesse, B., Thorpe, S.K.S., Verecke, E.E., D'Août, K., Fischer, M.S
- 1077 and Schilling, N., 2014. Fibre type composition in the lumbar perivertebral
- 1078 muscles of primates: implications for the evolution of orthograde in hominoids.
- 1079 Journal of Anatomy, 224(2), 113-131.
- 1080 Organ, J.M., Ward CV. 2006 Contours of the lateral tibial condyle with implications
- 1081 for *Australopithecus*. Journal of Human Evolution 51: 113-127.
- 1082 Partridge, T.C., Granger, D.E., Caffee, M.W., Clarke, R.J., 2003. Lower Pliocene hominid
- 1083 remains from Sterkfontein. Science 300, 607-612. Pickering, T.R., Clarke, R.J.,
- 1084 Heaton, J.L., 2004. The context of Stw 573, an early hominid
- 1085 skull and skeleton from Sterkfontein Member 2: taphonomy and paleoenvironment.
- 1086 Journal of Human Evolution 46, 277-295.
- 1087 Pickering, R., Herries, A.I.R., Woodhead, J.D., Hellstrom, J.C.,
- 1088 Green, H.E., Paul, B., Ritzman, T., Strait, D.S., Schoville,
- 1089 B.J., Hancox, P.J. 2018 U–Pb-dated flowstones restrict South
- 1090 African early hominin record to dry climate phases.
- 1091 Nature DOI: 10.1038/s41586-018-0711-0.
- 1092 Proffitt, T., Haslam, M., Merader, J., Boesch, C. Luncz, L. 2018 Revisiting Panda 100:
- 1093 Reanalysis of the first archaeological chimpanzee nut cracking lithic assemblage and
- 1094 its relevance to understanding the emergence of hominin technology. Proceedings of
- 1095 the 8<sup>th</sup>. Annual Meeting of the European Society for the study of Human Evolution,
- 1096 Faro, p. 157.
- 1097 Raichlen, D.A. & Gordon, A.D. (2017) Interpretation of Footprints from Site S Confirms
- 1098 Human-like Bipedal Biomechanics in Laetoli Hominins. Journal of Human
- 1099 Evolution 107:134-138.
- 1100 Reed, K. E. 1997. Early hominid evolution and ecological change through the
- 1101 African Plio-Pleistocene. Journal of Human Evolution 32, 289–322.
- 1102 Rein, T.R., Harrison, T., Carlson, K.J. and Harvati, K., 2017. Adaptation to suspensory
- 1103 locomotion in *Australopithecus sediba*. Journal of Human Evolution, 104, 1-12.

- 1104 Robinson, J.T. 1972 Early Hominid Posture and Locomotion.  
1105 Chicago: The University of Chicago Press.
- 1106 Schultz, A.H. 1937 Proportions, Variability and Asymmetries of the Long Bones of the  
1107 Limbs and Clavicles in Man and Apes. *Human Biology* 9 (3), 281-328.
- 1108 Seifert, L., Komar, J., Araújo, D. and Davids, K., 2016. Neurobiological degeneracy: a key  
1109 property for functional adaptations of perception and action to constraints.  
1110 *Neuroscience & Biobehavioral Reviews*, 69, pp.159-165.
- 1111 Simpson, S.W., Quade, J., Levin, N.E., Butler, R., Dupont-Nivet, G., Everett, M. and  
1112 Semaw, S. 2008. A female *Homo erectus* pelvis from Gona,  
1113 Ethiopia. *Science*, 322(5904), 1089-1092.
- 1114 Stern, J.T. 2000. Climbing to the top: a personal memoir of *Australopithecus afarensis*.  
1115 *Evolutionary Anthropology* 9, 113–133.
- 1116 Stern, J. T., Susman, R. L. 1983. The locomotor anatomy of *Australopithecus afarensis*.  
1117 *American Journal of Physical Anthropology*, 60, 279-317.
- 1118 Stern, J.T., Susman, R.L. 1991 ‘Total morphological pattern’ versus the ‘magic trait:’  
1119 conflicting approaches to the study of early hominid bipedalism. In: Senut B,  
1120 Coppens, Y. (Eds.) *Origine(s) de la bipédie chez les*  
1121 *Hominidés*, CNRS, Paris pp. 99–112:
- 1122 Su, D.F. 2016 The Taphonomy and Paleoeology of Korsi Dora Vertebrate Locality 1,  
1123 Woranso-Mille Study Area, Ethiopia In: Haile-Selassie Y, Su, D.F. (Eds.) *The*  
1124 *Postcranial Anatomy of Australopithecus afarensis:*  
1125 *New Insights from KSD-VP-1/1*. Dordrecht: Springer pp. 25-37
- 1126 Tocheri, M.W., Marzke, M.W., Liu, D., Bae, M., Jones, G.P., Williams, R.C. and  
1127 Razdan, A., 2003. Functional capabilities of modern and fossil hominid hands:  
1128 Three-dimensional analysis of trapezia. *American Journal of Physical*  
1129 *Anthropology*, 122(2), 101-112.
- 1130 Tocheri, M.W., Orr, C.M., Jacofsky, M.C., Marzke, M.W. 2008 The evolutionary history of  
1131 the hominin hand since the last common ancestor of *Pan* and *Homo*.  
1132 *Journal of Anatomy* 212(4):544-562.
- 1133 Toussaint, M., Macho, G.A., Tobias, P.V., Partridge, T.C, Hughes, A.R (2003) The third  
1134 partial skeleton of a late Pliocene hominin (StW 431) from Sterkfontein, South Africa  
1135 *South African Journal of Science* 99, 215-223.

- 1136 Trinkaus, E., Holliday, T.W. and Auerbach, B.M., 2014. Neandertal clavicle length.  
1137 Proceedings of the National Academy of Sciences, 111(12), 4438-4442.
- 1138 Ungar, P. S., Scott, R. S., Grine, F. E., & Teaford, M. F. (2010). Molar  
1139 microwear textures and the diets of *Australopithecus anamensis* and  
1140 *Australopithecus afarensis*. Philosophical Transactions of the Royal  
1141 Society of London, B, Biological Sciences, 365, 3345–3354.
- 1142 Venkataraman, V., Kraft, T., Desilva, J., Dominy, N., 2013a. Phenotypic plasticity of  
1143 climbing-related traits in the ankle joint of great apes and rainforest hunter-gatherers.  
1144 Human Biology 85, 309-328.
- 1145 Venkataraman, V.V., Kraft, T.S. and Dominy, N.J., 2013b.  
1146 Tree climbing and human evolution. Proceedings of the National Academy of  
1147 Sciences, 110(4),1237-1242.
- 1148 Vrba, E. S. 1975. Some evidence of chronology and palaeoecology of Sterkfontein,  
1149 Swartkrans, and Kromdraai from the fossil Bovidae. Nature, 254, 301–304.
- 1150 Wagner, A. 2008 Robustness and evolvability: a paradox resolved.  
1151 Proceedings of the Royal Society of London 275, 91-100.
- 1152 Wainwright, P. 1991 Ecomorphology: Experimental Functional Anatomy for Ecological  
1153 Problems. American Zoologist 31, 680-693.
- 1154 Walker, A., Leakey, R.E.F. 1993 The postcranial bones. In: Walker, A., Leakey, R.E.F.  
1155 (Eds.) The Nariokotome *Homo erectus* skeleton. Cambridge, Mass,  
1156 Harvard University Press pp. 95-160.
- 1157 Wang, W.J. and Crompton, R.H., 2003. Size and power required for motion with  
1158 implication for the evolution of early hominids.  
1159 Journal of Biomechanics, 36(9), pp.1237-1246.
- 1160 Wang, W.J. and Crompton, R.H., 2004. The role of load-carrying in the evolution  
1161 of modern body proportions. Journal of Anatomy, 204(5),417-430.
- 1162 Ward, C.V., 2002. Interpreting the posture and locomotion of *Australopithecus afarensis*:  
1163 where do we stand? Yearbook of Physical Anthropology 35, 185–215.
- 1164 Ward, C.V., 2013. Postural and Locomotor Adaptations of *Australopithecus* Species. In:  
1165 K.E., Reed, Fleagle, J.G., Leakey, R.E. (Eds.), The Paleobiology of *Australopithecus*.  
1166 Springer, Dordrecht, pp. 235–245.
- 1167 Ward, C.V., Leakey, M.G. and Walker, A., 2001. Morphology of *Australopithecus anamensis*  
1168 from Kanapoi and Allia Bay, Kenya. Journal of Human Evolution, 41(4), 255-368.
- 1169 Whitacre, J. M. 2010. Degeneracy: a link between evolvability, robustness and complexity in

- 1170 biological system. BMC Journal of Theoretical Biology and Medical Modelling,  
1171 7, 1-0.
- 1172 White, TD, Asfaw B, Beyene, Y, Haile-Selassie, Y, Lovejoy CO, Suwa, G WoldeGabriel G  
1173 *Ardipithecus ramidus* and the Paleobiology of Early Hominids. Science 326 (5949)  
1174 64-86. DOI:10.11256/Science.1175802.
- 1175 Wynn, J. G., Sponheimer, M., Kimbel, W. H., Alemseged, Z.,  
1176 Reed, K., Bedaso, Z. K., Wilson, J.N. 2013. Diet of *Australopithecus*  
1177 *afarensis* from the Pliocene Hadar Formation, Ethiopia.  
1178 Proceedings of the National Academy of Sciences USA, 110, 10495–10500.

1179

## 1180 **Figures**

1181

1182 *All images from casts unless otherwise stated*

1183

1184 1 Top: Pelvis of StW 573, Bottom: the Robinson (1972) reconstruction of the pelvis of StW  
1185 431 (original photograph)

1186

1187 2 Innominates of (Left) StW 431 (Right) StW 573

1188

1189 3 Innominates of (Left to Right) StW 431, Sts14 and AL-288-1

1190

1191 4 Innominate of StW 573 showing acetabulum

1192

1193

1194 5 Top, proximal femur of StW 573 mounted in its acetabulum; bottom, mounted in  
1195 acetabulum of StW 431 innominate

1196

1197 6 Top, the proximal femur from Jacovec Cavern StW598 mounted in acetabulum of StW  
1198 573; bottom, the proximal femur of StW 573 mounted in acetabulum of the Sts 14 innominate

1199

1200 7 Figure 7 Top left, the proximal femur from Jacovec Cavern StW598 mounted in the  
1201 acetabulum of Sts 14; Top right, the StW367 proximal femur from Member 4; Bottom;  
1202 Proximal femora of (left to right) Jacovec StW598, AL-288-1, StW 573 and KNM WT 15000

1203

1204 8 Top, the right clavicle of StW 573, Bottom, the right clavicle of KNM WT 15000

- 1205
- 1206 9 The mastoid process (arrow) on the skull of StW 573
- 1207
- 1208 10 Distal humerus of StW 573. Top, ventral view showing brachioradialis crest; bottom,  
1209 dorsal view showing shape of distal condyles
- 1210
- 1211 11 Distal humerus of KNM WT 15000, dorsal view
- 1212
- 1213 12 Lateral distal femoral condyle of StW 573
- 1214
- 1215 13 Medial distal femoral condyle of StW 573
- 1216
- 1217 14 Valgus angles of the knee in, left to right: KNM WT 15000, AL-288-1 and StW 573
- 1218
- 1219 15 Proximal tibial surface of Kanapoi KNM KP 29285A  
1220 (downloaded from open source: [www.africanfossils.org](http://www.africanfossils.org),  
1221 XYZ dimensions 68.00; 103.30; 60.66 mm)
- 1222
- 1223 16 Proximal tibial surface of (Top) StW 573 and (Bottom) KNM WT 15000
- 1224
- 1225 17 (Top) Frontal, (Bottom left) Lateral, and (Bottom) Medial perspectives of Kanapoi  
1226 KNM KP 29285A (downloaded from open source: [www.africanfossils.org](http://www.africanfossils.org), XYZ dimensions  
1227 68.00; 103.30; 60.66 mm)
- 1228
- 1229 18 (Top) Frontal, (Middle) Lateral and (Bottom) Medial perspectives of proximal tibial  
1230 condyles of StW 573
- 1231
- 1232 19 (Top) Frontal, (Middle) Lateral and (Bottom) Medial perspectives of proximal tibial  
1233 condyles of KNM WT 15000
- 1234
- 1235 20 (Top) Axial, (Middle) Lateral and (Bottom) Medial perspectives of distal femoral  
1236 condyles of AL-288-1
- 1237

- 1238 21 Radius of curvature of the distal tibial condyle/plafond  
1239 Top: StW 573 Bottom: KNM WT 15000  
1240  
1241 22 Kanapoi distal right tibia KNM KP 29285 from lateral side, ((downloaded from open  
1242 source: [www.africanfossils.org](http://www.africanfossils.org),  
1243 Dimensions: x=40.16; y=97.82; z=40.50 mm.)  
1244  
1245 23 Long bones of the upper and lower limbs of StW 573  
1246  
1247 24 Figure 24 Archival image of an indigenous arboreal forager climbing a thin vine using  
1248 flexed elbow postures and hallucal grasp (courtesy of Kirk Endicott)  
1249  
1250  
1251 25 An indigenous Batek arboreal forager demonstrating his hallucal grasp for climbing a  
1252 small vine (video frame, courtesy of Vivek Venkataraman)  
1253  
1254 26 Frames from the official video (['Drawin' on Darwin' - Live drawing created at the Meeting](#)  
1255 [of the Primate Society of Great Britain | Saranjit Birdi | Axisweb](#)) of :Top, the artist Saranjit  
1256 Birdi drawing with his foot Bottom: closeup to show precision of hallucal grasp (courtesy of  
1257 Emily Saunders and the artist)  
1258  
1259  
1260 27 Video frame of a parkour athlete brachiating on an I-beam, demonstrating the plasticity of  
1261 human finger capabilities (see Halsey *et al.* 2017, permission of the subject and courtesy  
1262 Susannah K.S. Thorpe)  
1263  
1264 28 Handbones of StW 573  
1265  
1266 28 Apical ridge on the trapezium of: left *Gorilla gorilla beringei*, right StW 573 (originals)

1267 Figure 1 Top: Pelvis of StW 573, Bottom: the Robinson (1972) reconstruction of the pelvis of  
1268 StW 431 (archival photograph)

1269

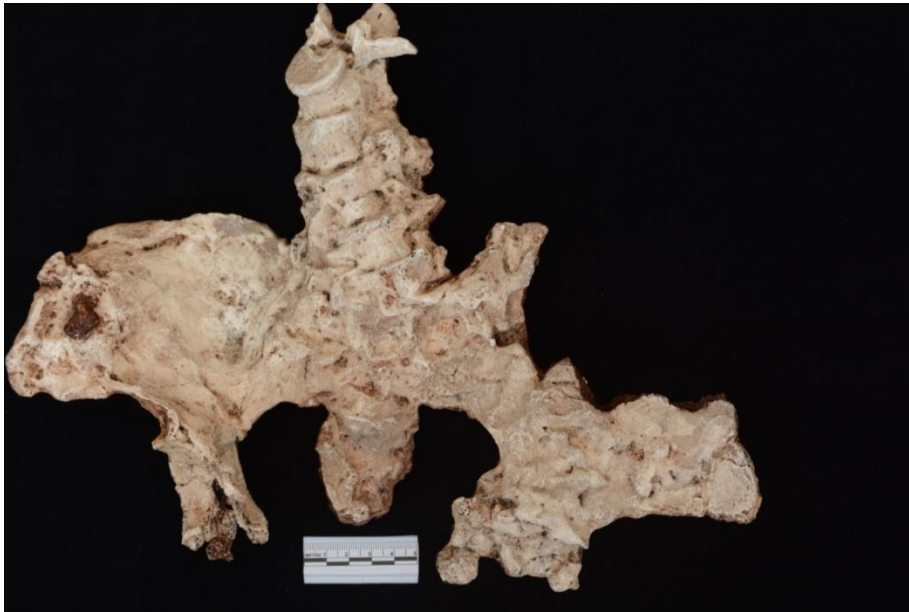

1270

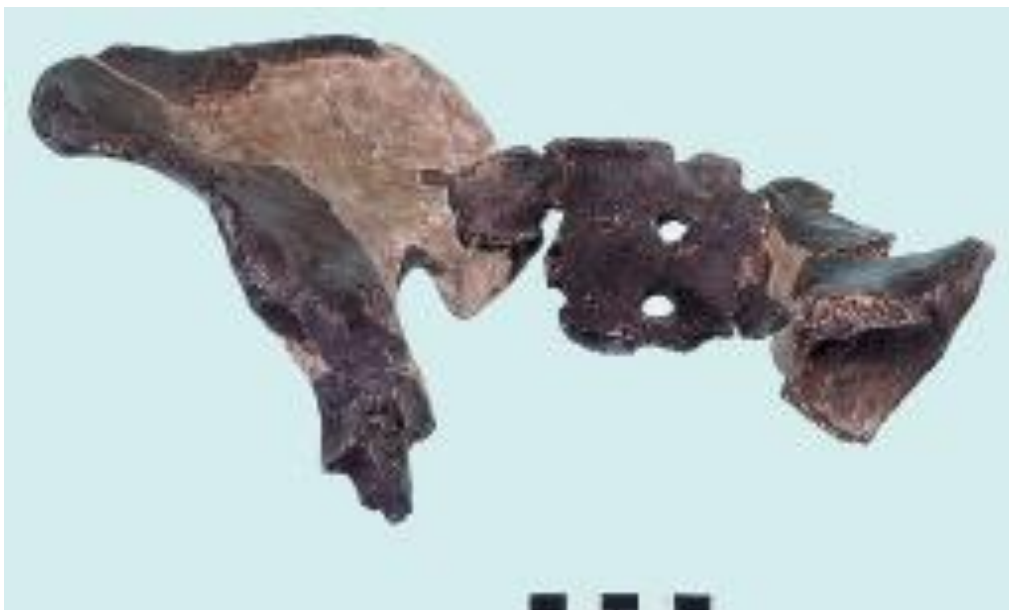

1271

1272

1273

1274

1275

1276

1277

1278 Figure 2 Innominates of (Left) StW 431 (Right) StW 573

1279

1280

1281

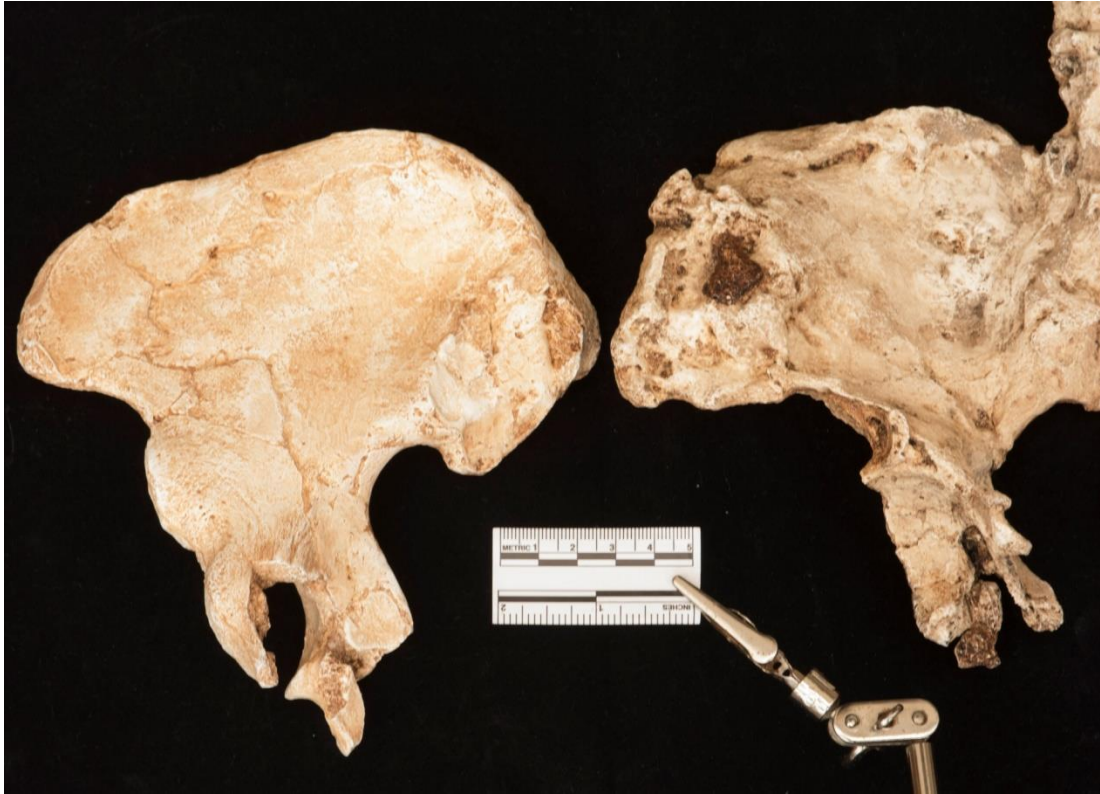

1282

1283

1284

1285

1286

1287

1288

1289

1290

1291

1292

1293



1294 Figure 3 Innominates of (Left to Right) StW 431, Sts 14 and AL-288-1

1295

1296

1297

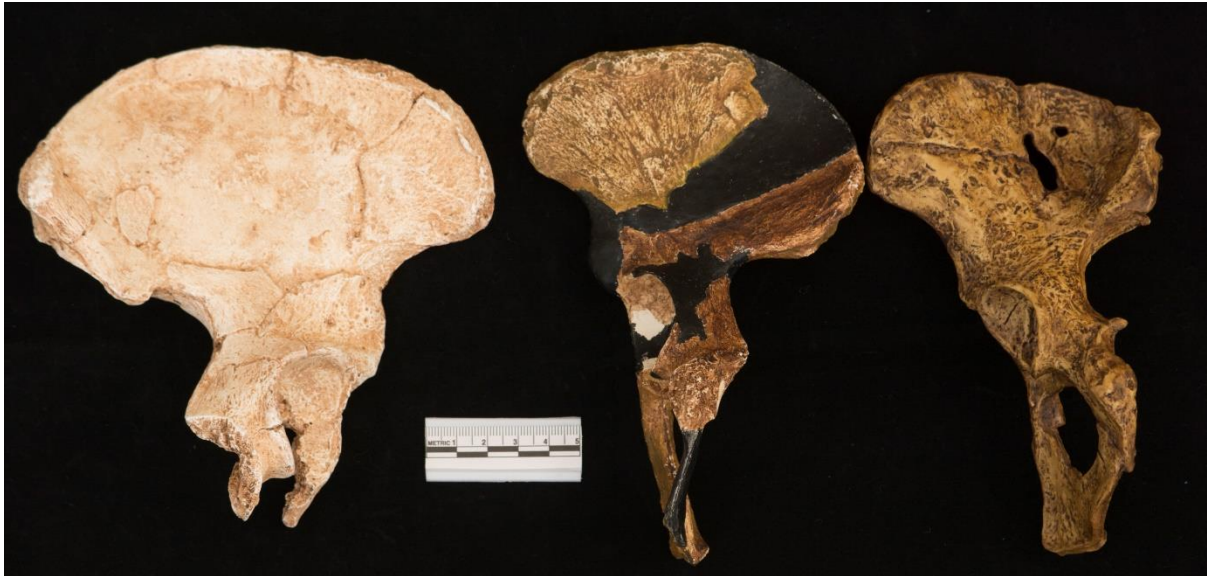

1298

1299

1300

1301

1302

1303

1304

1305

1306

1307

1308

1309

1310

1311

1312

1313 Figure 4 Innominate of StW 573 showing acetabulum

1314

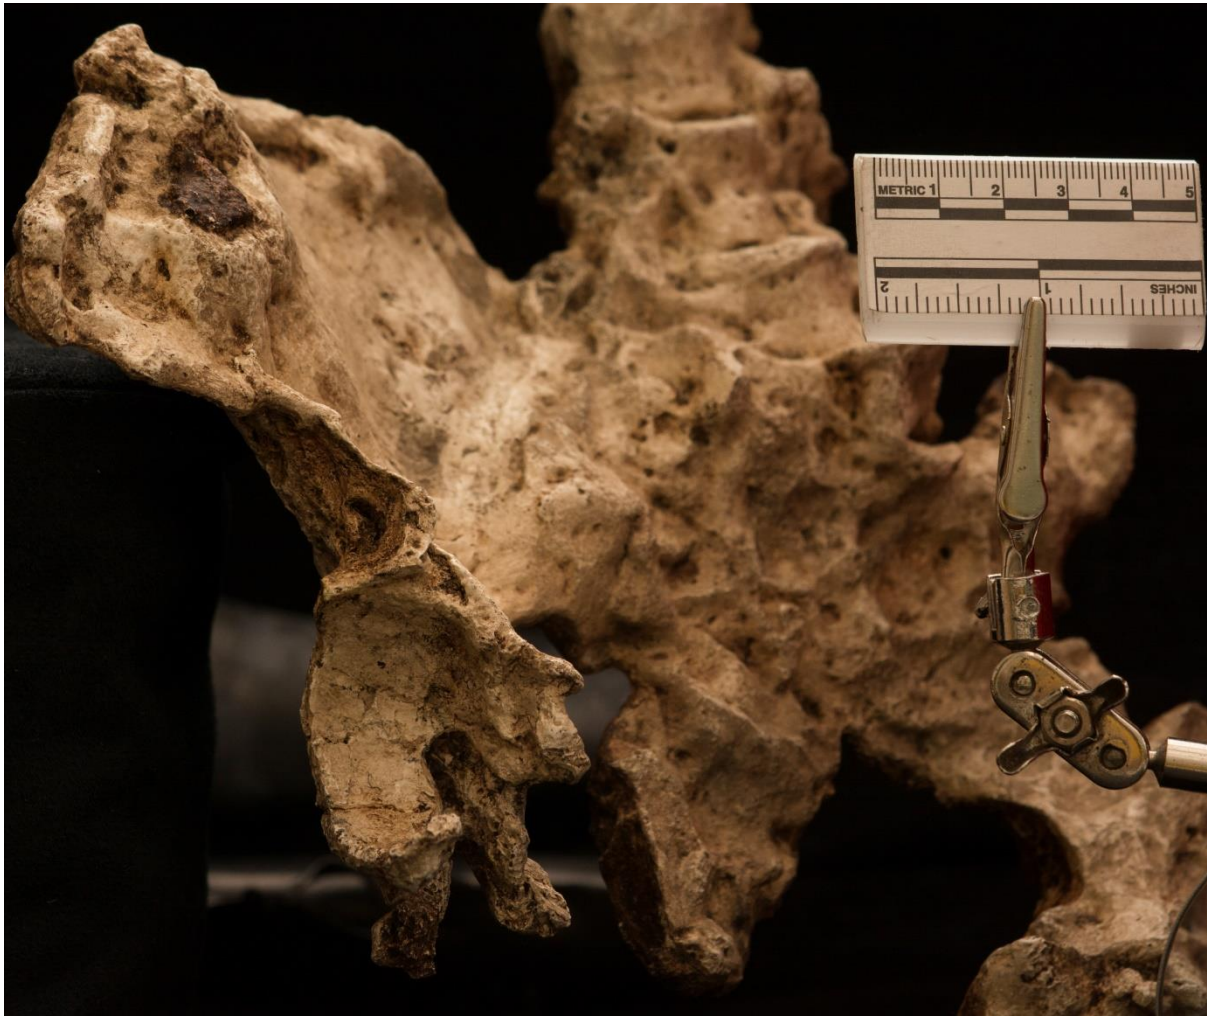

1315

1316

1317 Figure 5 Top, proximal femur of StW 573 mounted in its acetabulum; Bottom, mounted  
1318 in acetabulum of StW 431 innominate

1319

1320

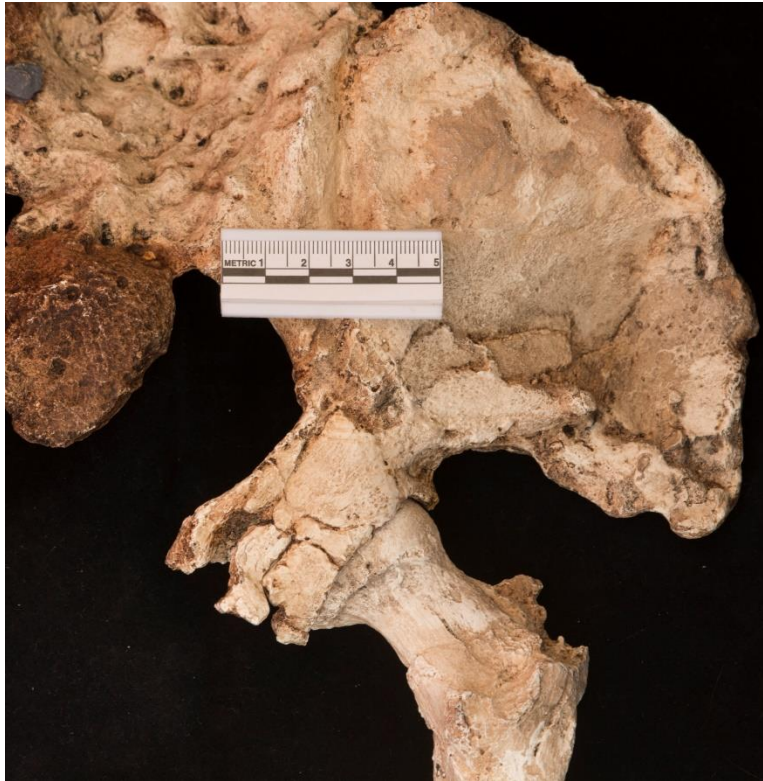

1321

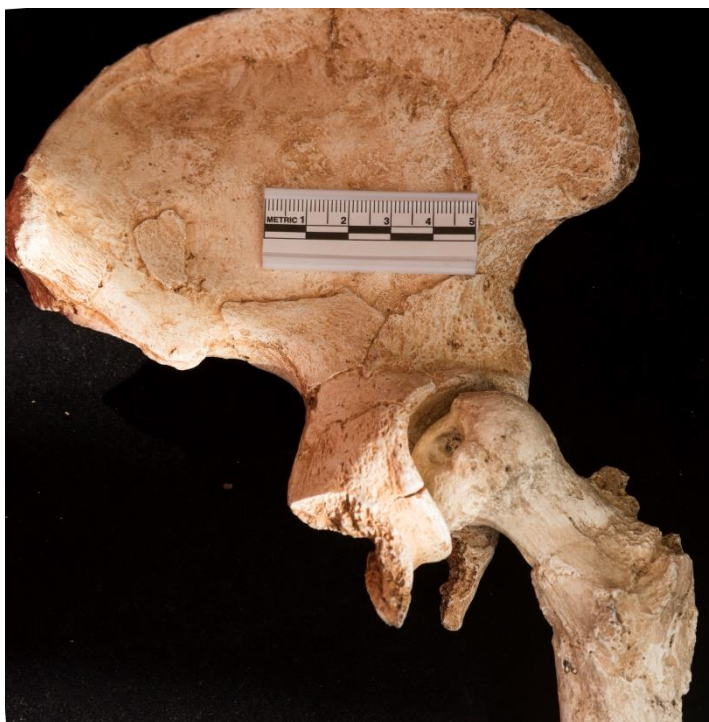

1322

1323

1324

1325 Figure 6: Top, the proximal femur from Jacovec Cavern StW 598 mounted in acetabulum  
1326 of StW 573; Bottom, the proximal femur of StW 573 mounted in acetabulum of the Sts  
1327 14 innominate

1328

1329

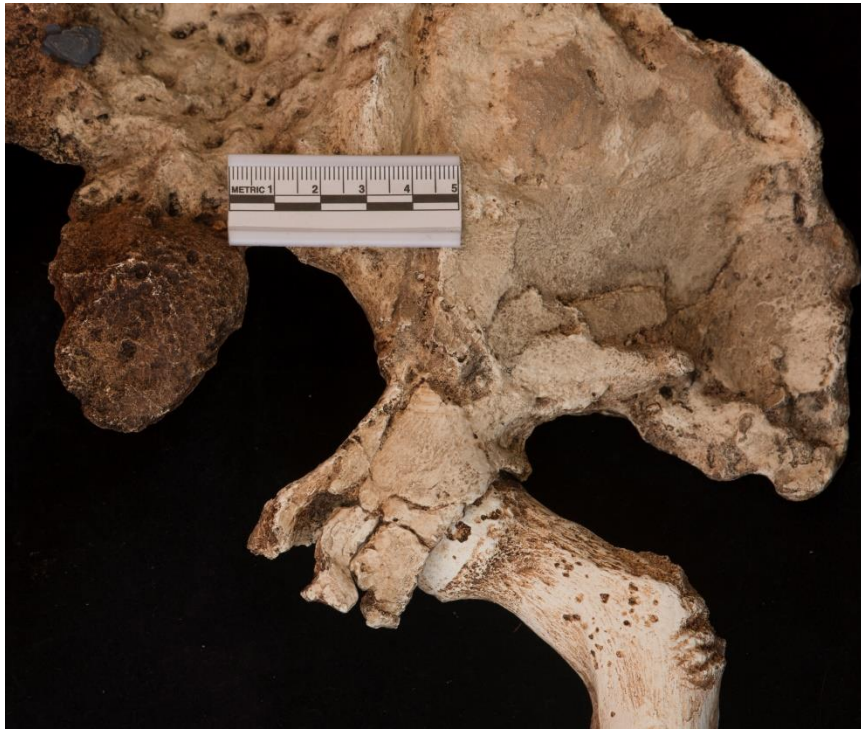

1330

1331

1332

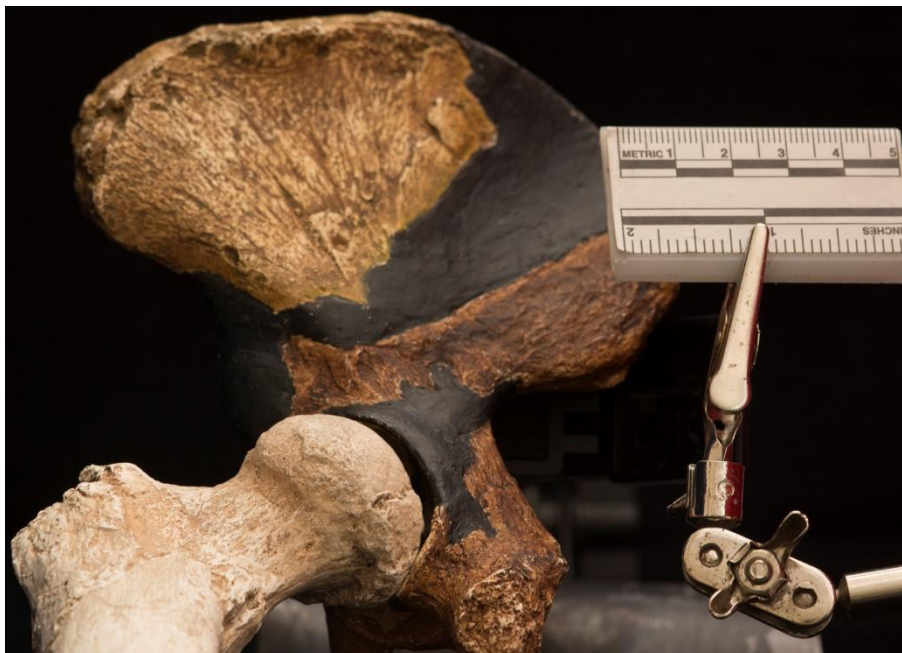

1333

1334 Figure 7: Top left, the proximal femur from Jacovec Cavern StW 598 mounted in the  
1335 acetabulum of Sts 14; Top right, the StW 367 proximal femur from Member 4; Bottom;  
1336 Proximal femora of (left to right) Jacovec StW 598, AL-288-1, StW 573 and KNM WT  
1337 15000  
1338  
1339

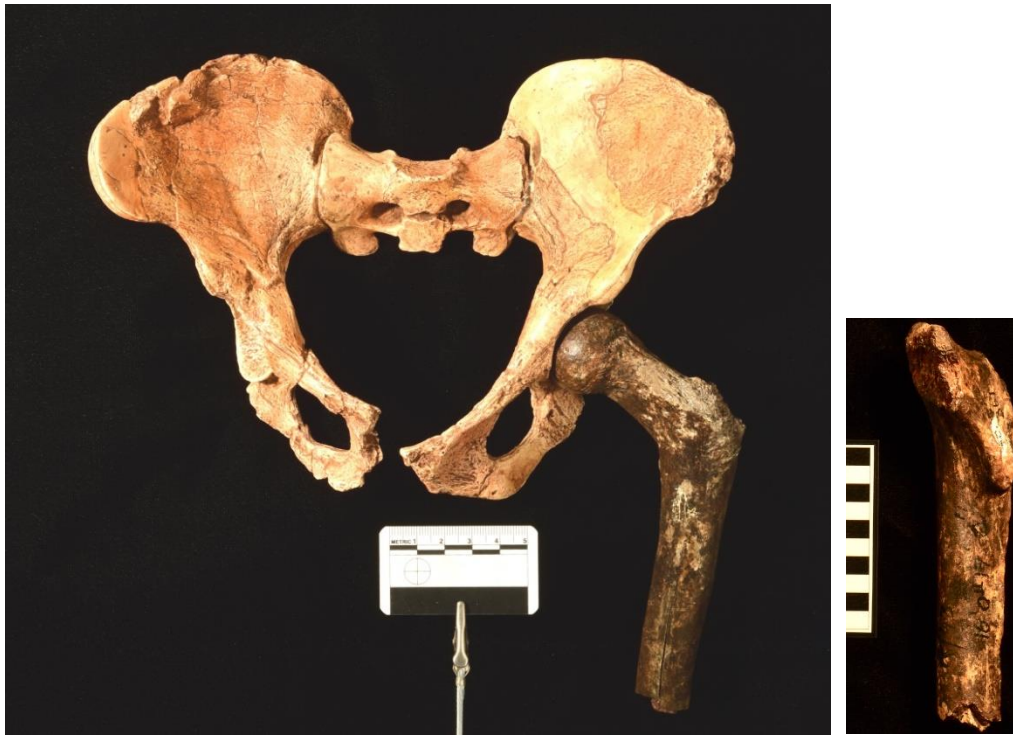

1340  
1341

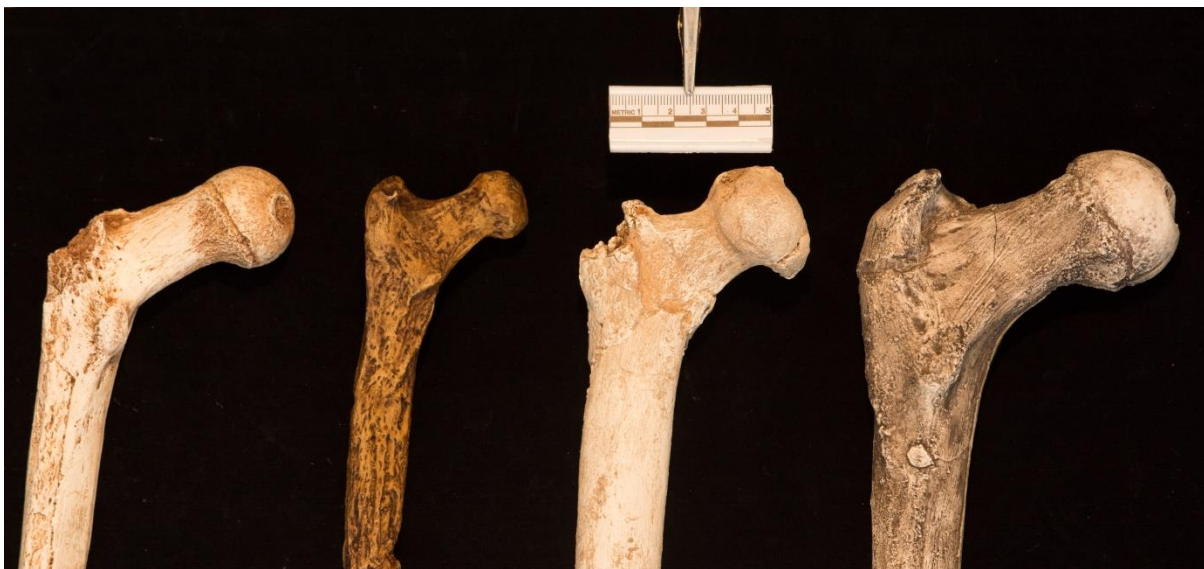

1342  
1343  
1344

1345 Figure 8 Top: The right clavicle of StW 573 Bottom: The right clavicle of KNM WT 15000

1346

1347

1348

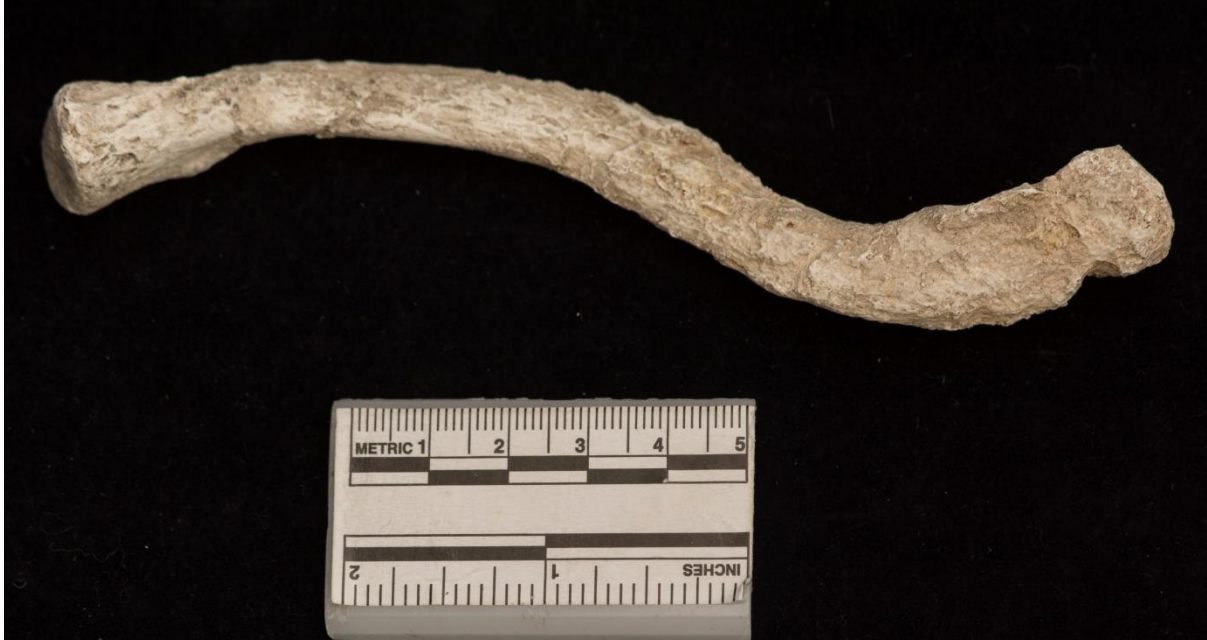

1349

1350

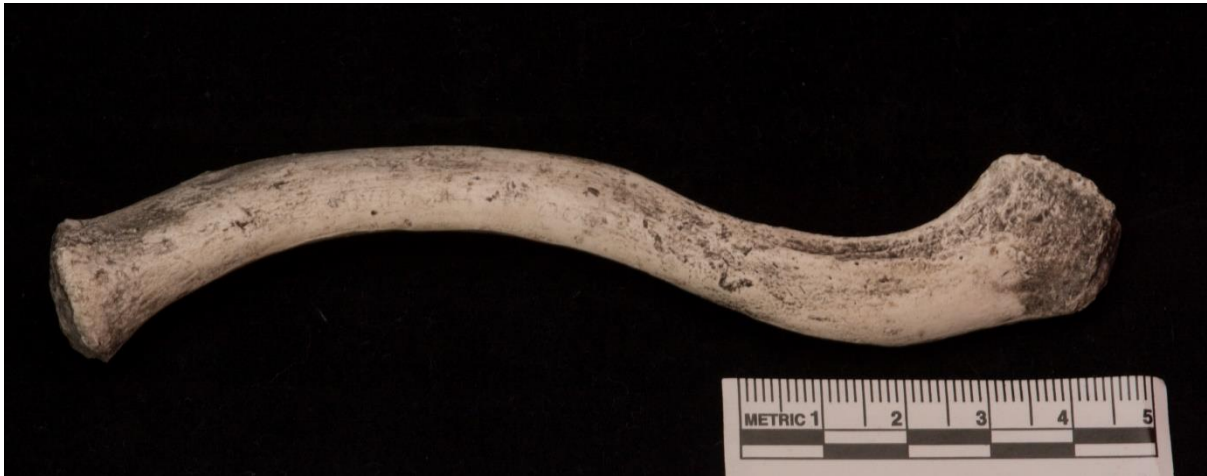

1351

1352

1353

1354

1355

1356 Figure 9: The mastoid process (arrow) on the skull of StW 573

1357

1358

1359

1360

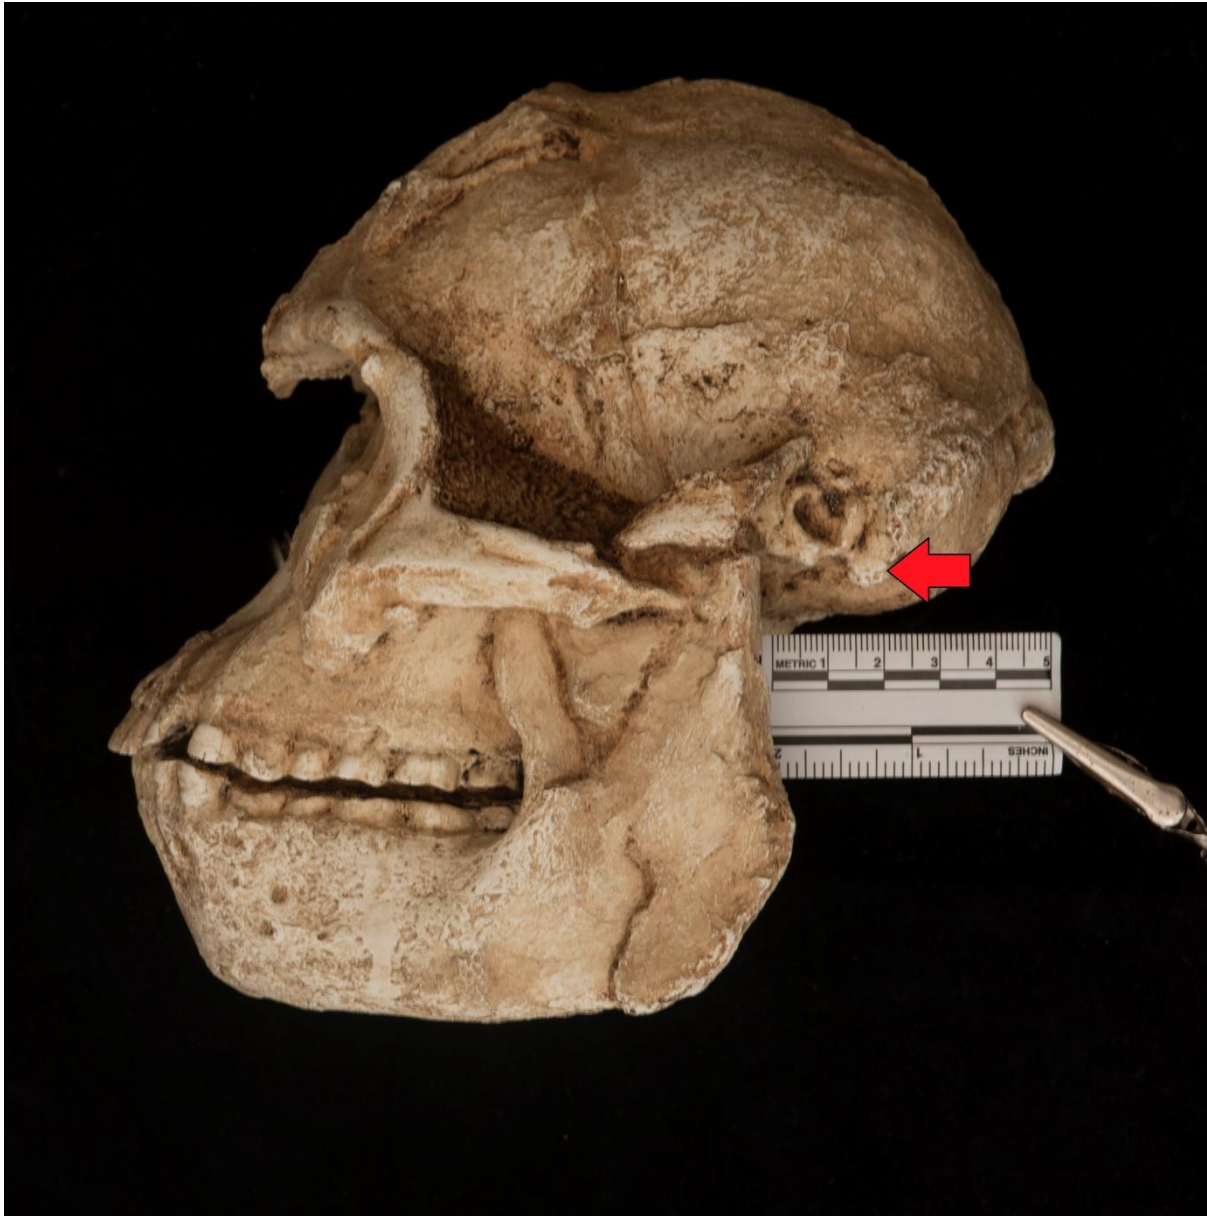

1361

1362

1363

1364

1365

1366 Figure 10: Distal humerus of StW 573. Top, ventral view showing brachioradialis crest;  
1367 Bottom, dorsal view showing shape of distal condyles

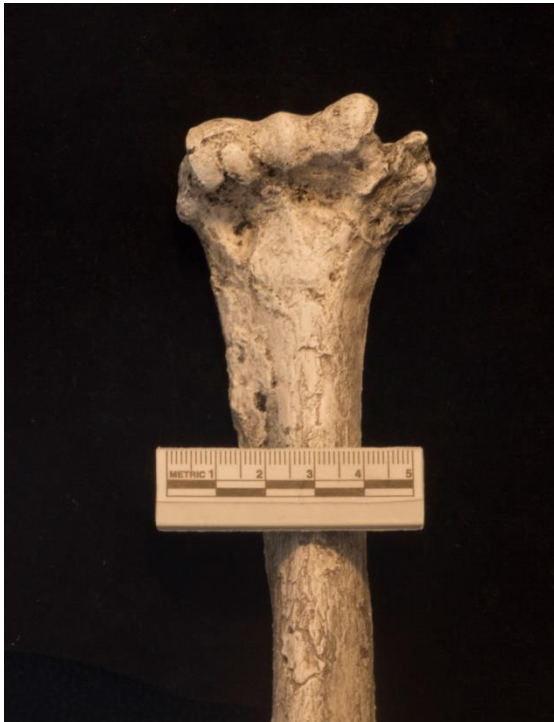

1368

1369

1370

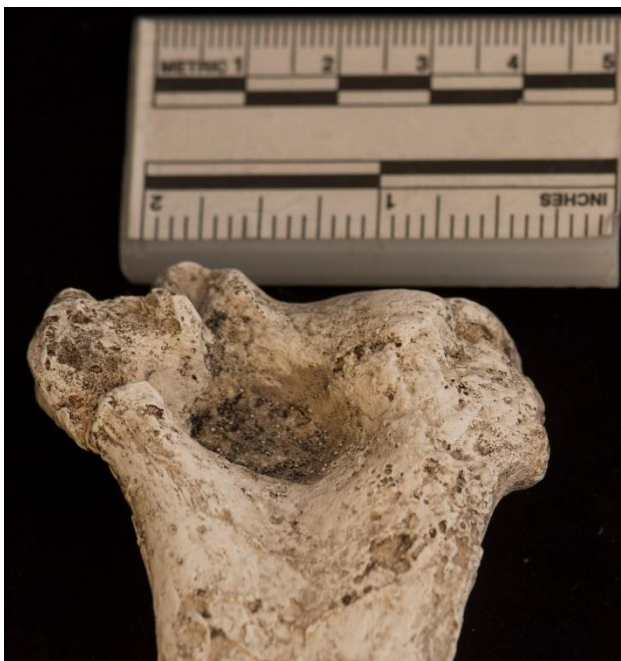

1371

1372



1373 Figure 11: Distal humerus of KNM WT 15000, dorsal view

1374

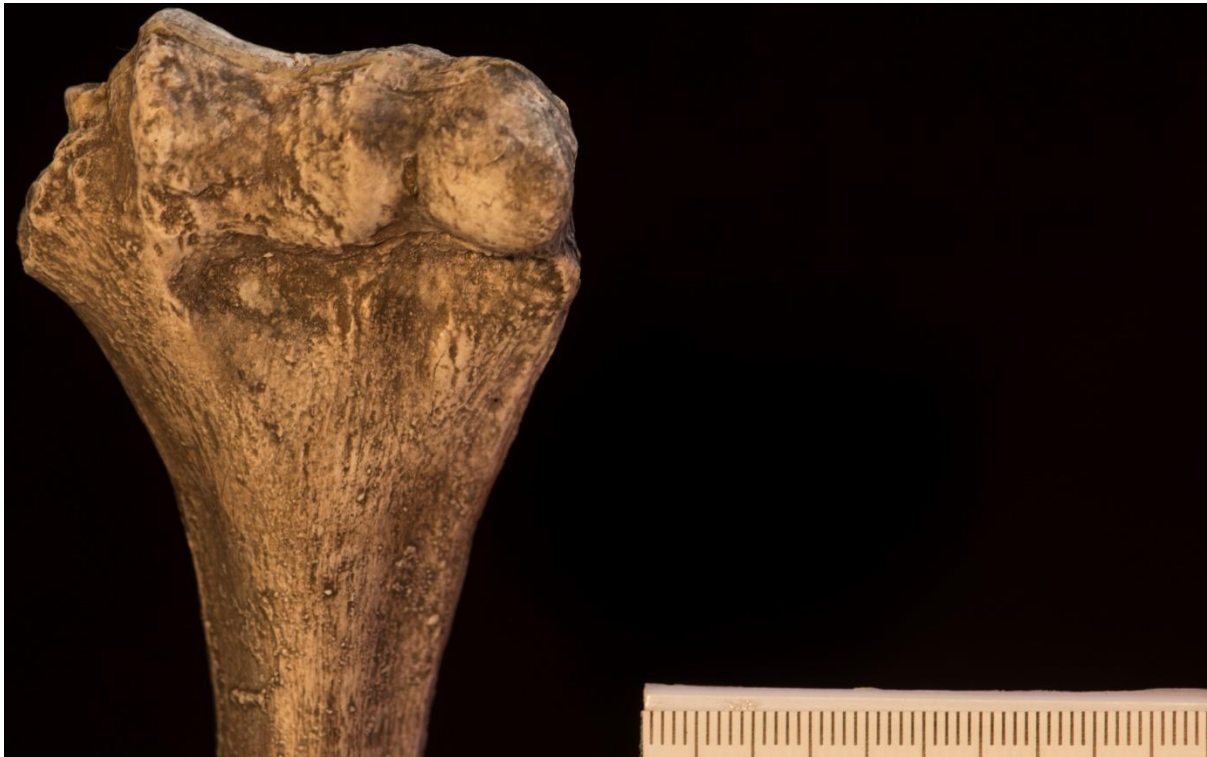

1375

1376

1377 Figure 12: Lateral distal femoral condyle of StW 573

1378

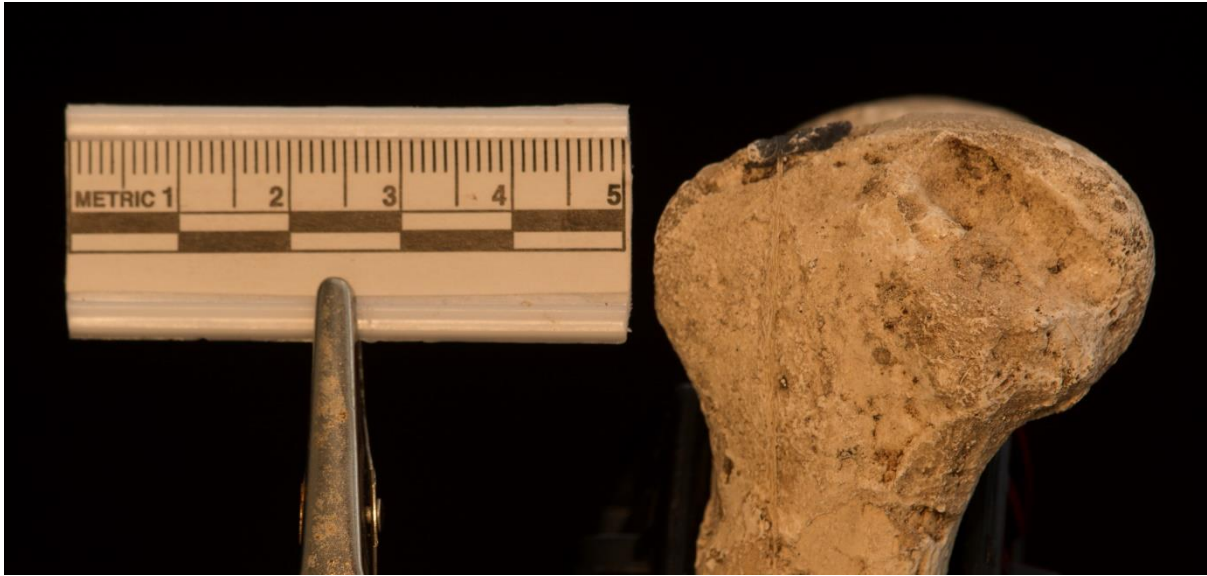

1379

1380

1381

1382

1383

1384

1385

1386

1387

1388 Figure 13: Medial distal femoral condyle of StW 573

1389

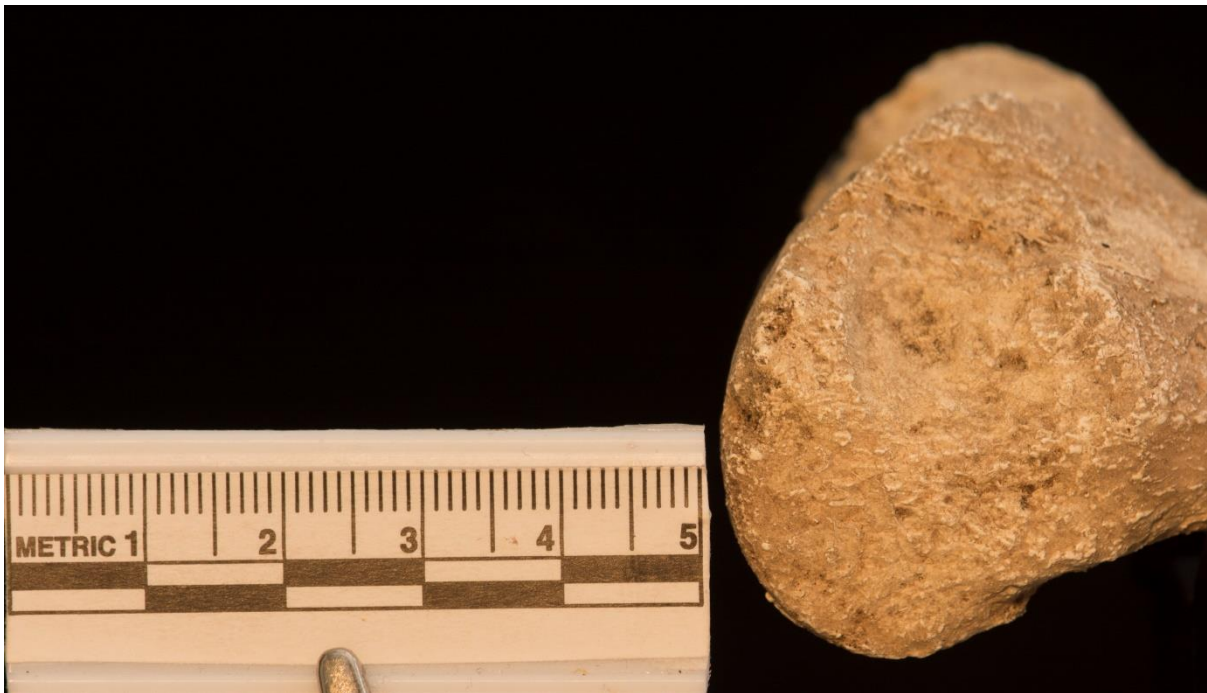

1390

1391

1392

1393 Figure 14: Valgus angles of the knee in, left to right: KNM WT 15000, AL-288-1 and StW  
1394 573

1395

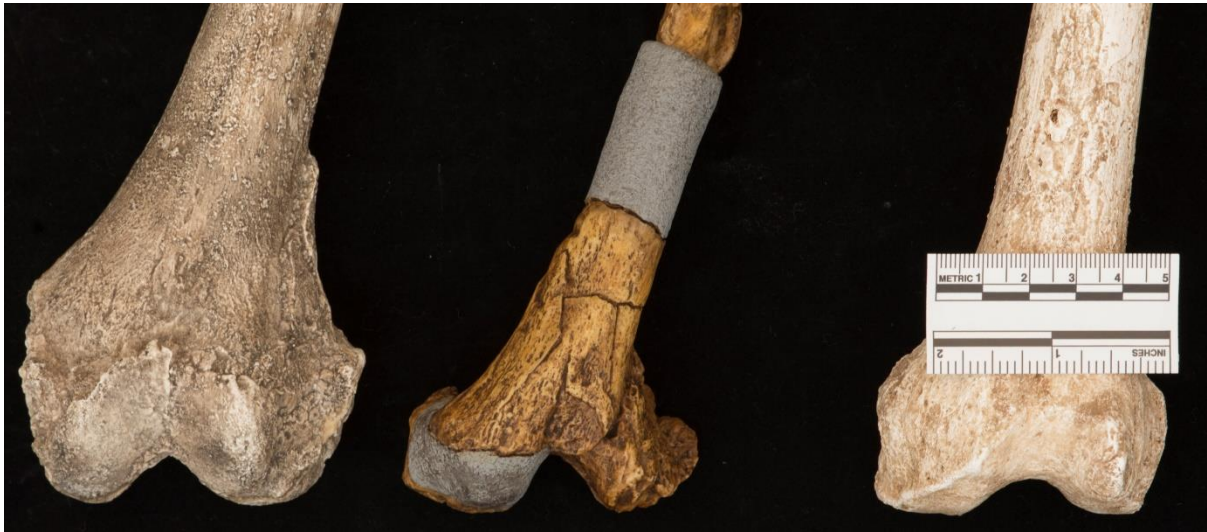

1396

1397

1398

1399

1400

1401

1402 Figure 15: Proximal tibial surface of Kanapoi KNM-KP 29285A

1403 (downloaded from open source: [www.africanfossils.org](http://www.africanfossils.org),

1404 XYZ dimensions 68.00; 103.30; 60.66 mm)

1405

1406

1407

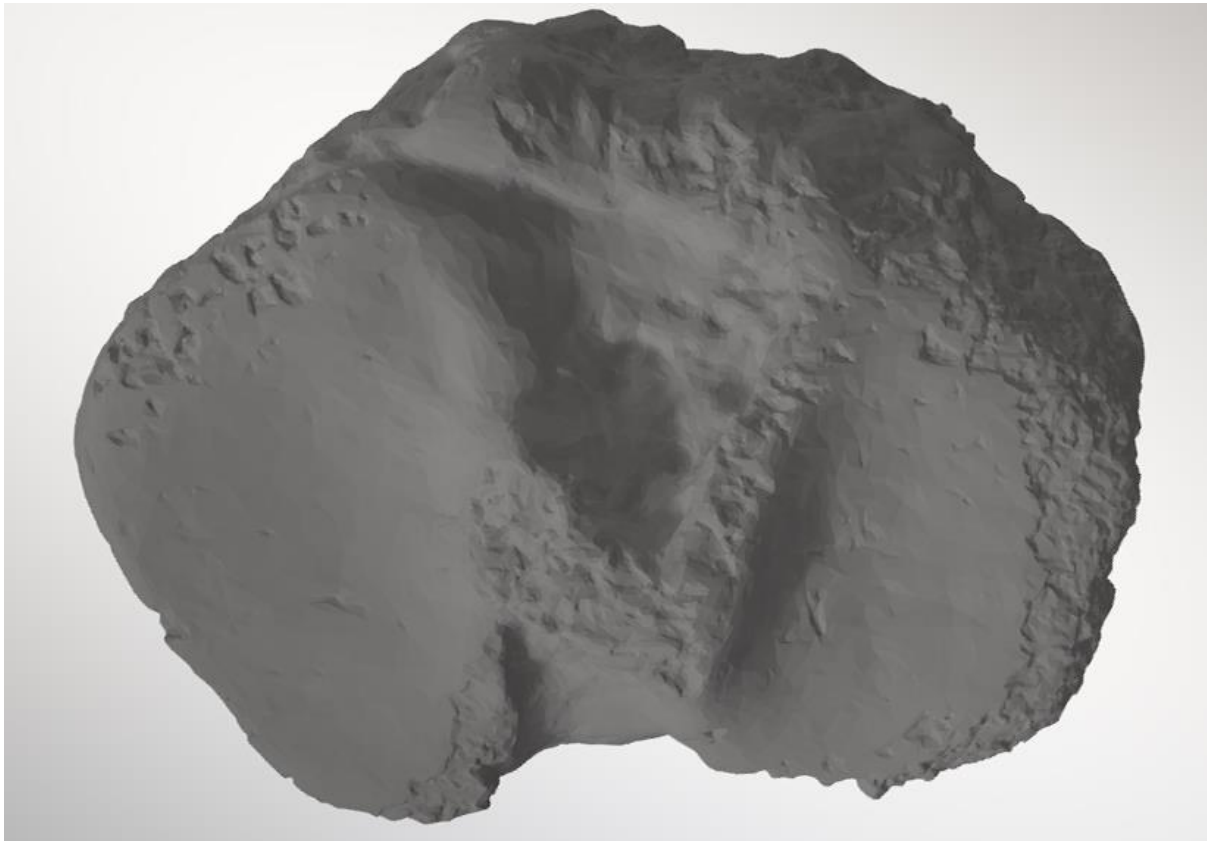

1408

1409

1410

1411

1412

1413

1414

1415 Figure 16: Proximal tibial surface of (Top) StW 573 and (Bottom) KNM WT 15000

1416

1417

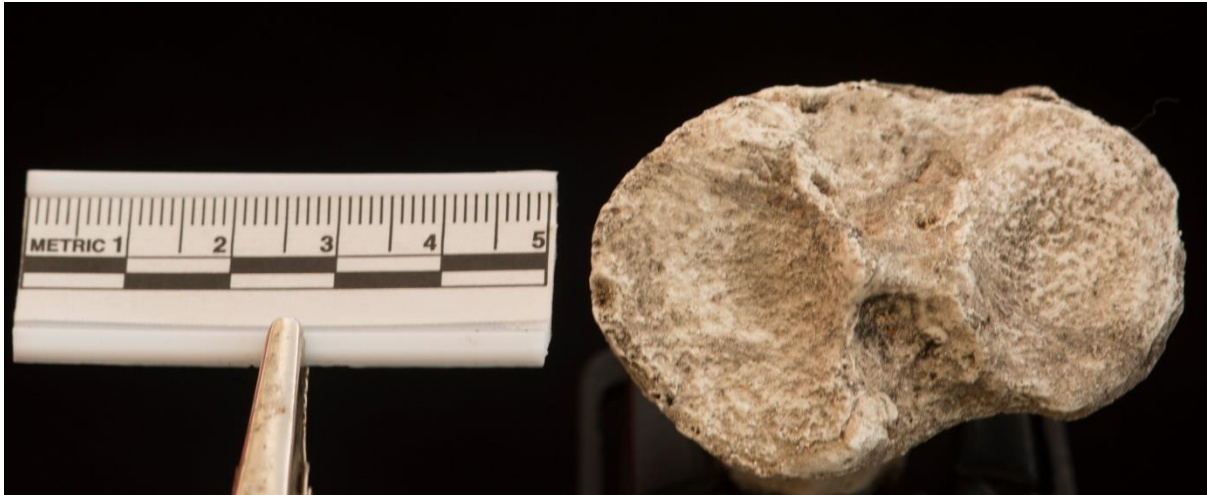

1418

1419

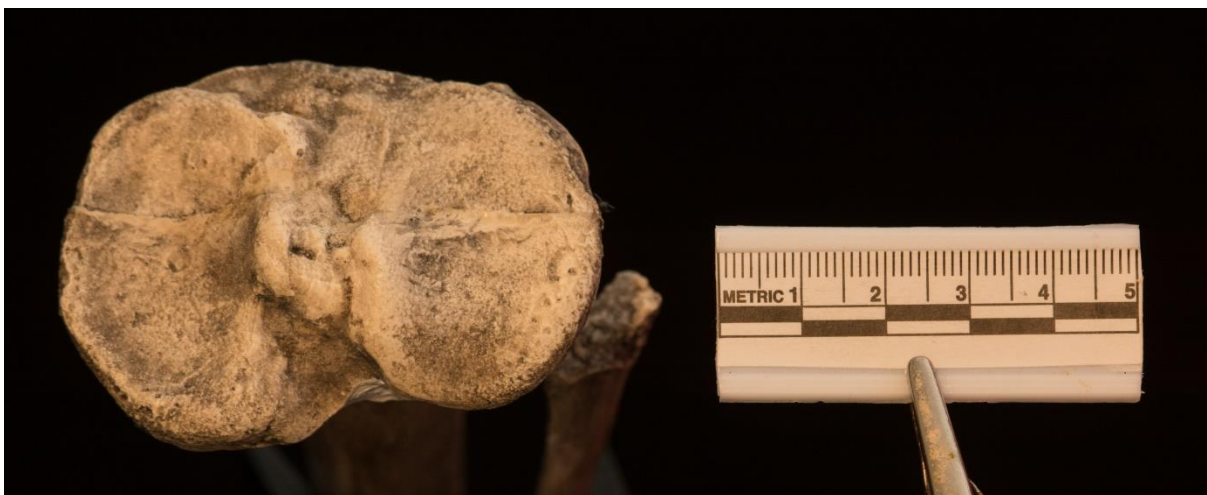

1420

1421

1422

1423

1424 Figure 17 (Top) Frontal, (Bottom left) Lateral, and (Bottom) Medial perspectives of  
1425 Kanapoi KNM-KP 29285A (downloaded from open source: [www.africanfossils.org](http://www.africanfossils.org), XYZ  
1426 dimensions 68.00; 103.30; 60.66 mm)

1427

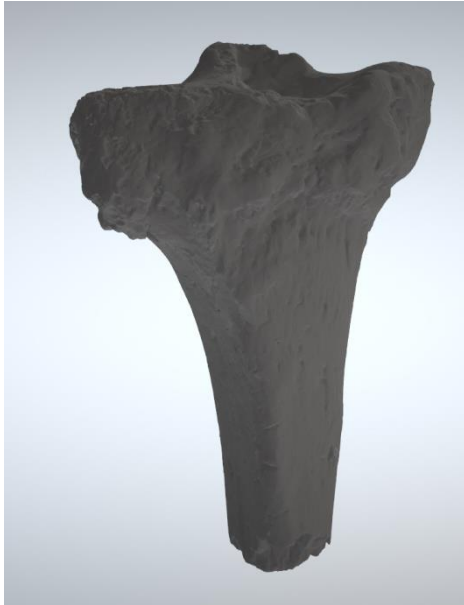

1428

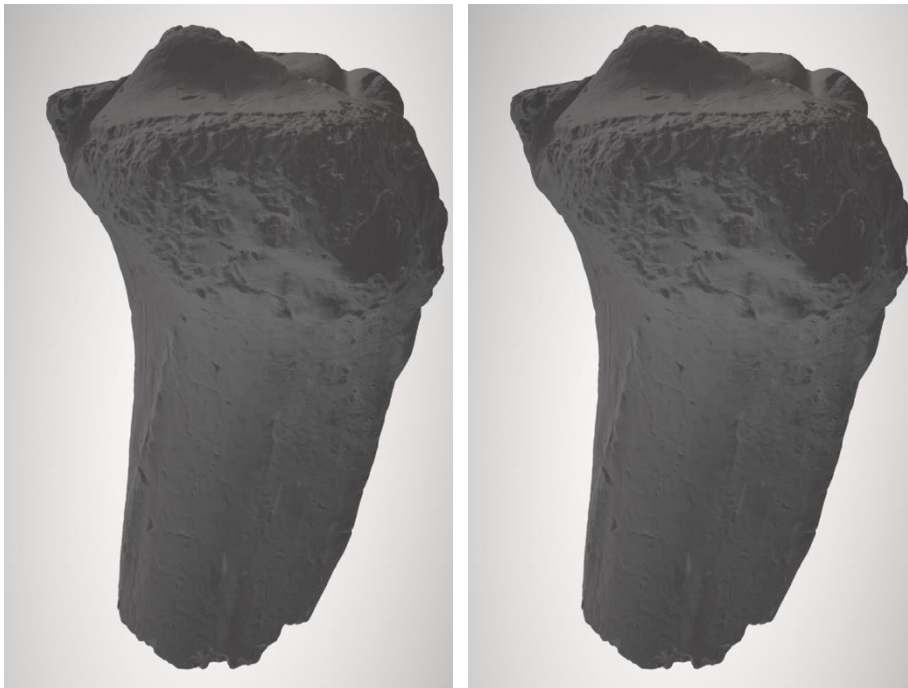

1429

1430

1431

1432

1433

1434

1435

1436 Figure 18 (Top) Frontal, (Middle) Lateral and (Bottom) Medial perspectives of proximal  
1437 tibial condyles of StW 573

1438

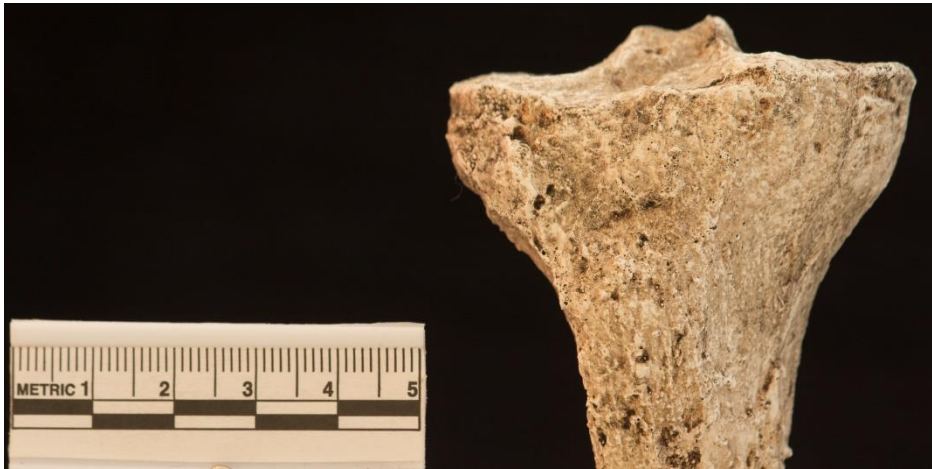

1439

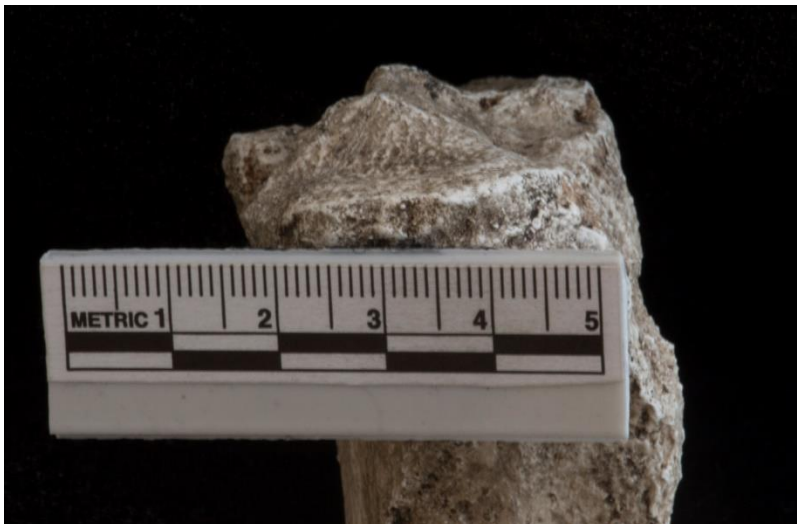

1440

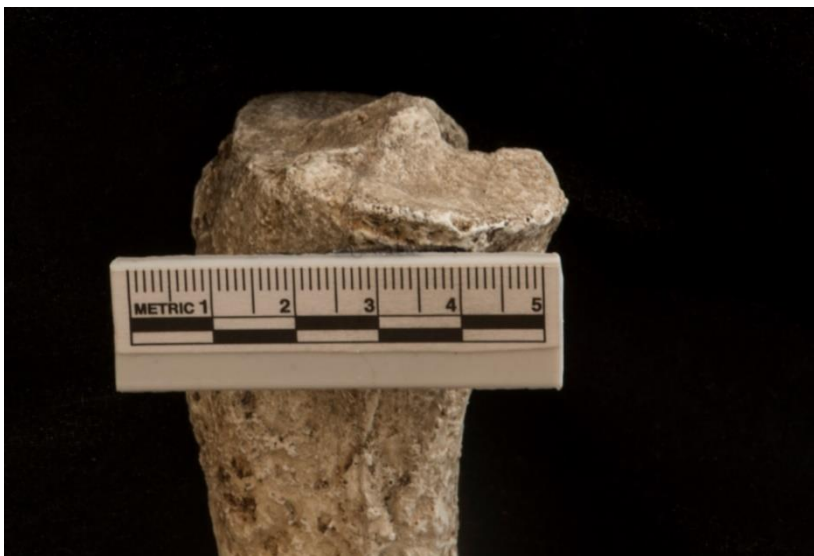

1441



1442 Figure 19 (Top) Frontal, (Middle) Lateral and (Bottom) Medial perspectives of proximal  
1443 tibial condyles of KNM WT 15000

1444

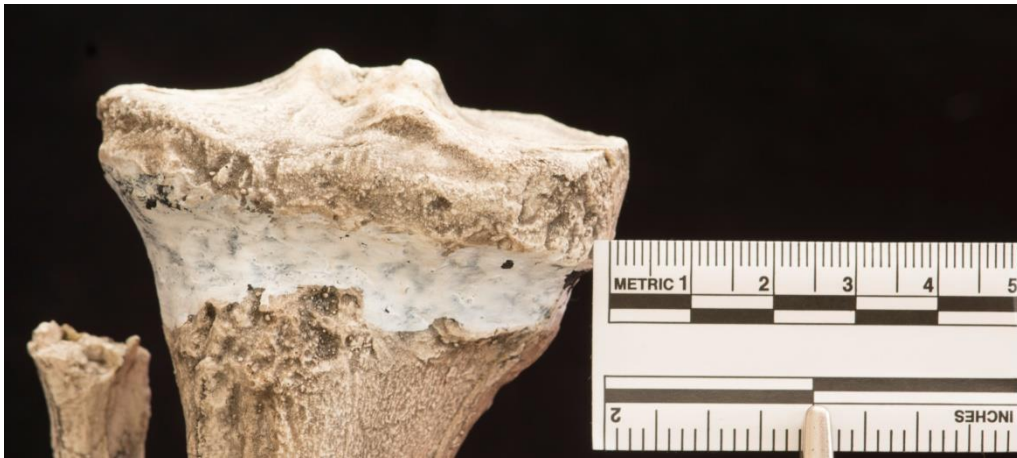

1445

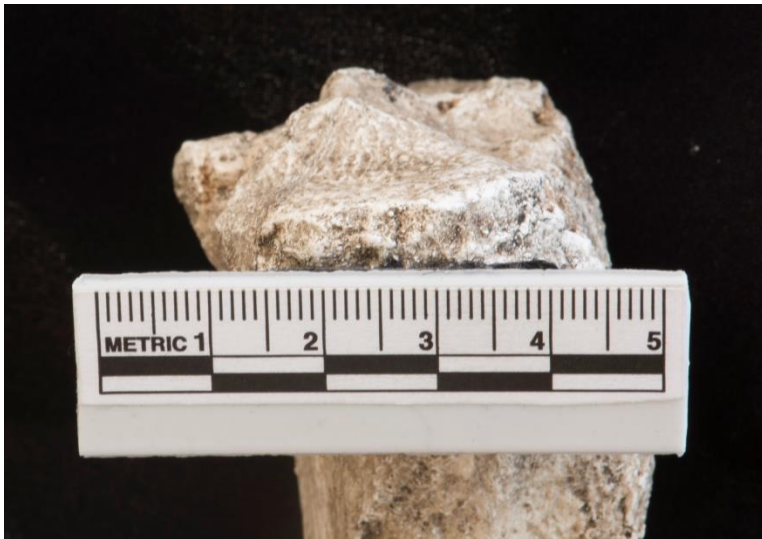

1446

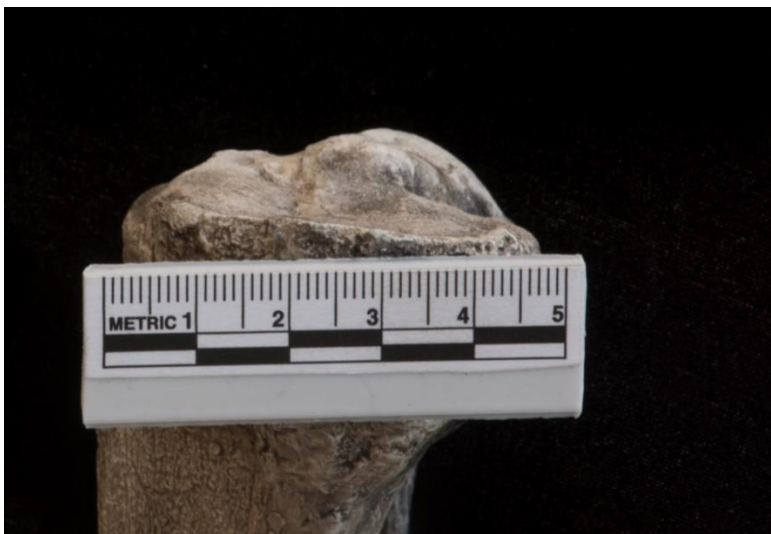

1447

1448

1449

1450 Figure 20 (Top) Axial, (Middle) Lateral and (Bottom) Medial perspectives of distal femoral  
1451 condyles of AL-288-1

1452

1453

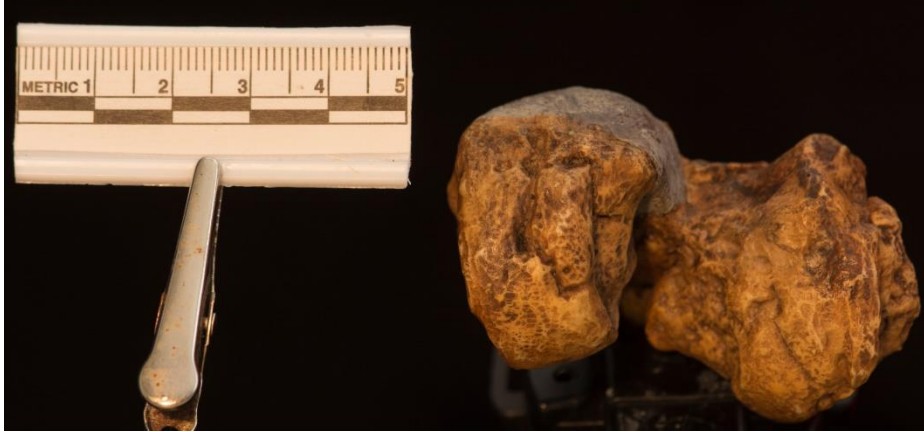

1454

1455

1456

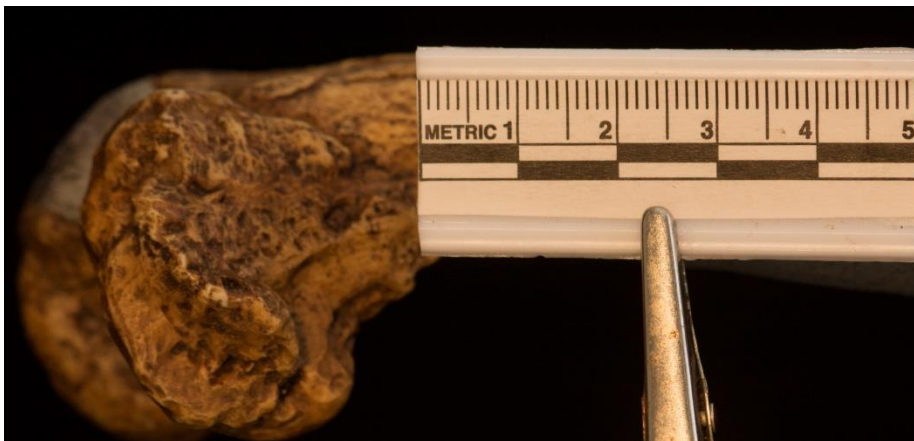

1457

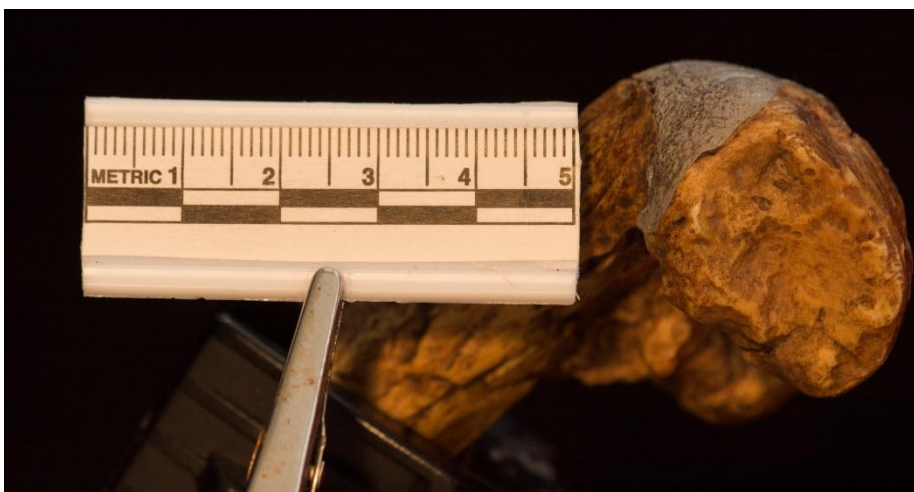

1458

1459

1460

1461 Figure 21 Radius of curvature of the distal tibial condyle/plafond

1462 Top: StW 573 Bottom: KNM WT 15000

1463

1464

1465

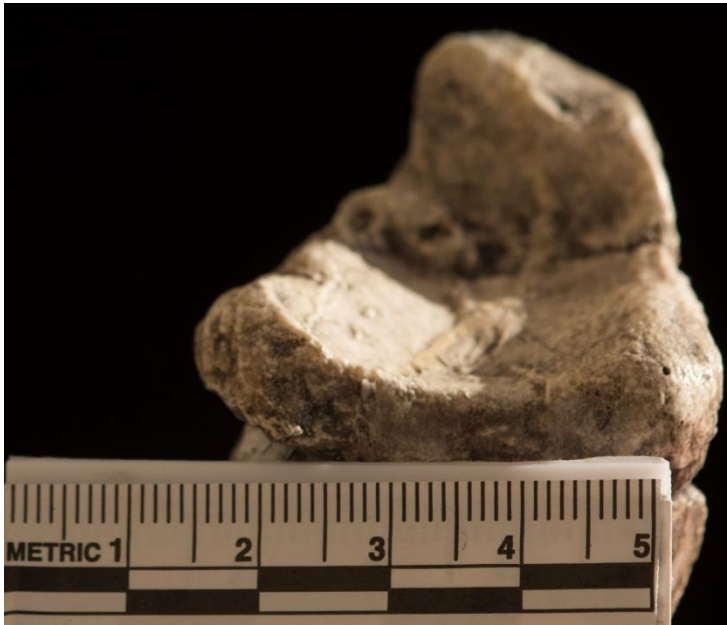

1466

1467

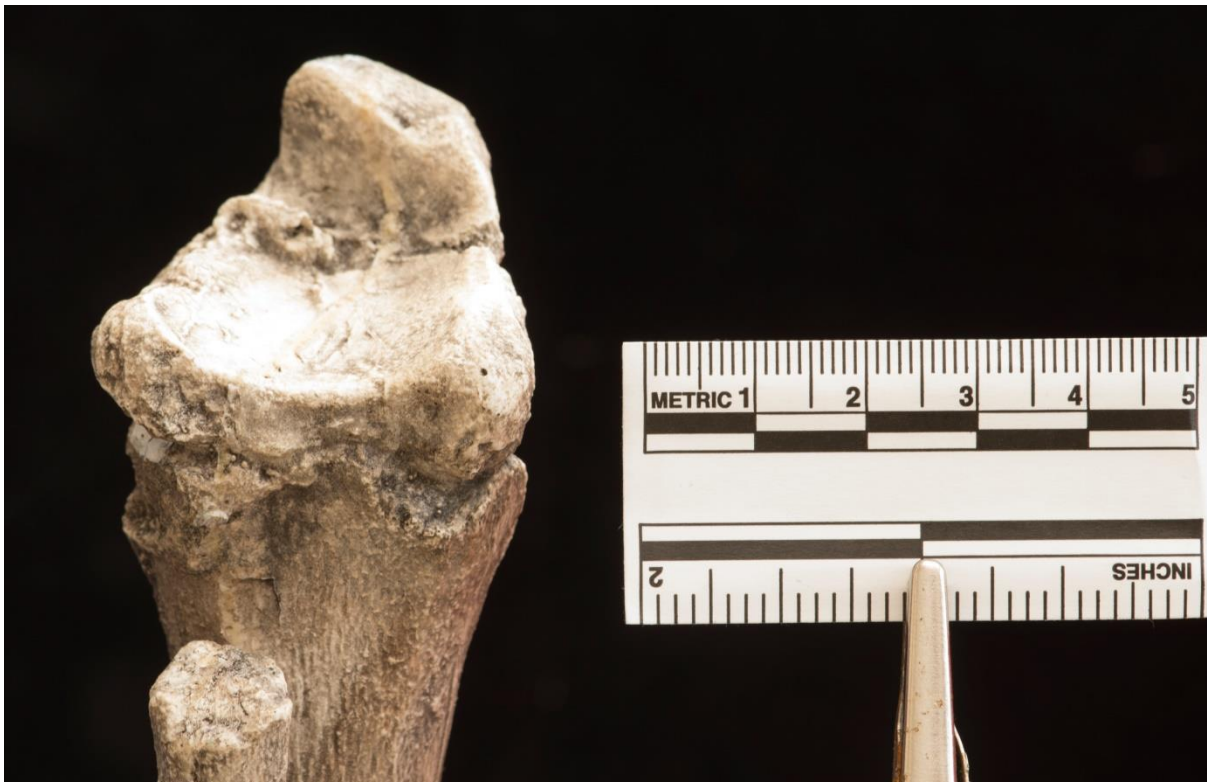

1468

1469 Figure 22 Kanapoi distal right tibia KNMKP 29285 from lateral side, ((downloaded from  
1470 open source: [www.africanfossils.org](http://www.africanfossils.org),  
1471 Dimensions: x=40.16; y=97.82; z=40.50 mm.)

1472

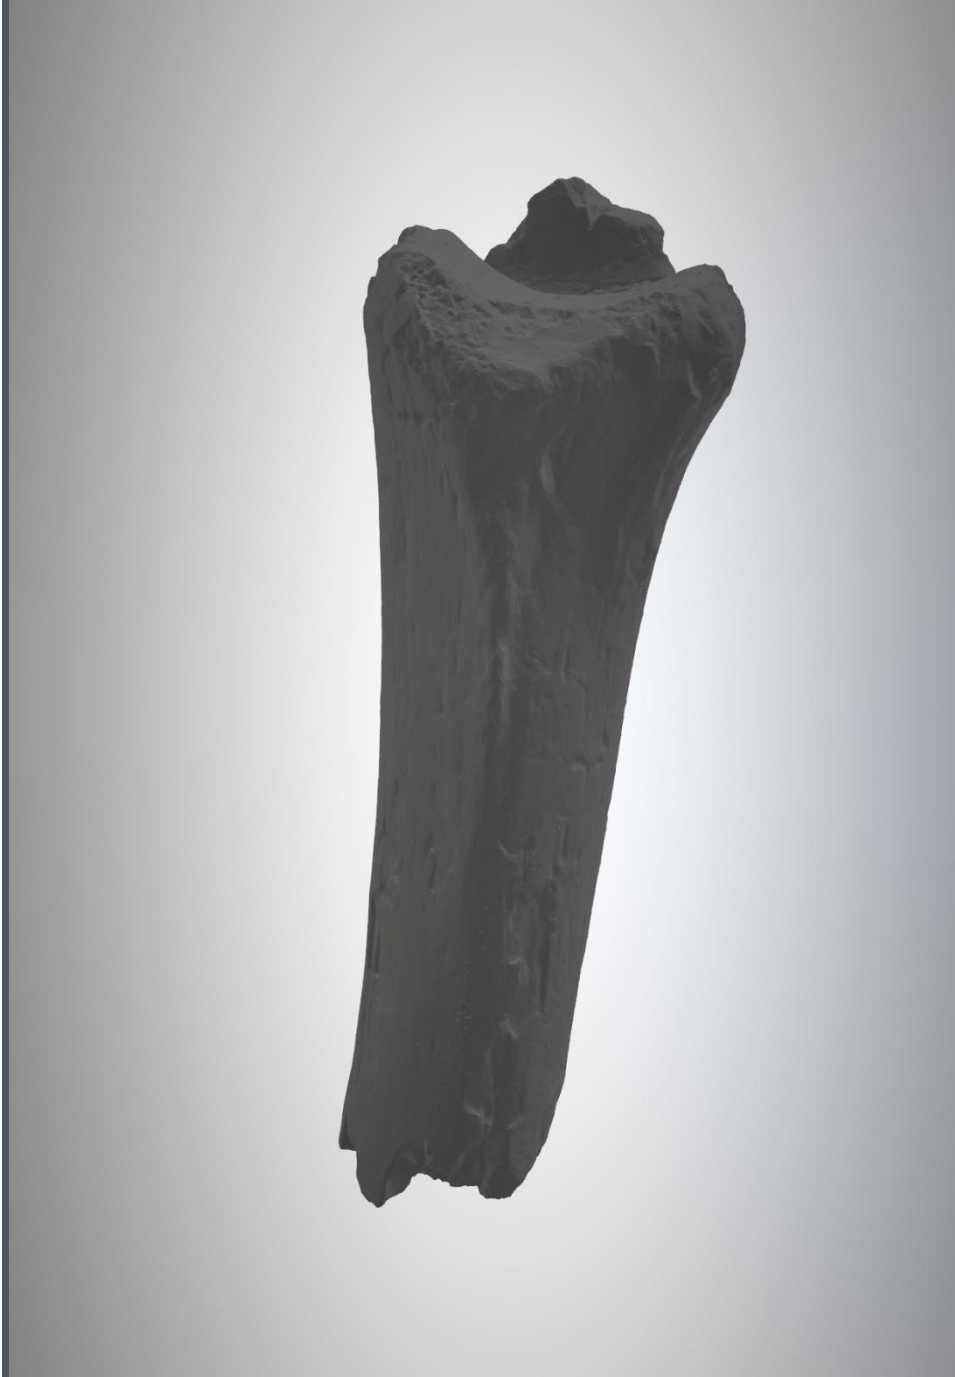

1473

1474

1475

1476

1477 Figure 23 Long bones of the upper and lower limbs of StW 573

1478

1479

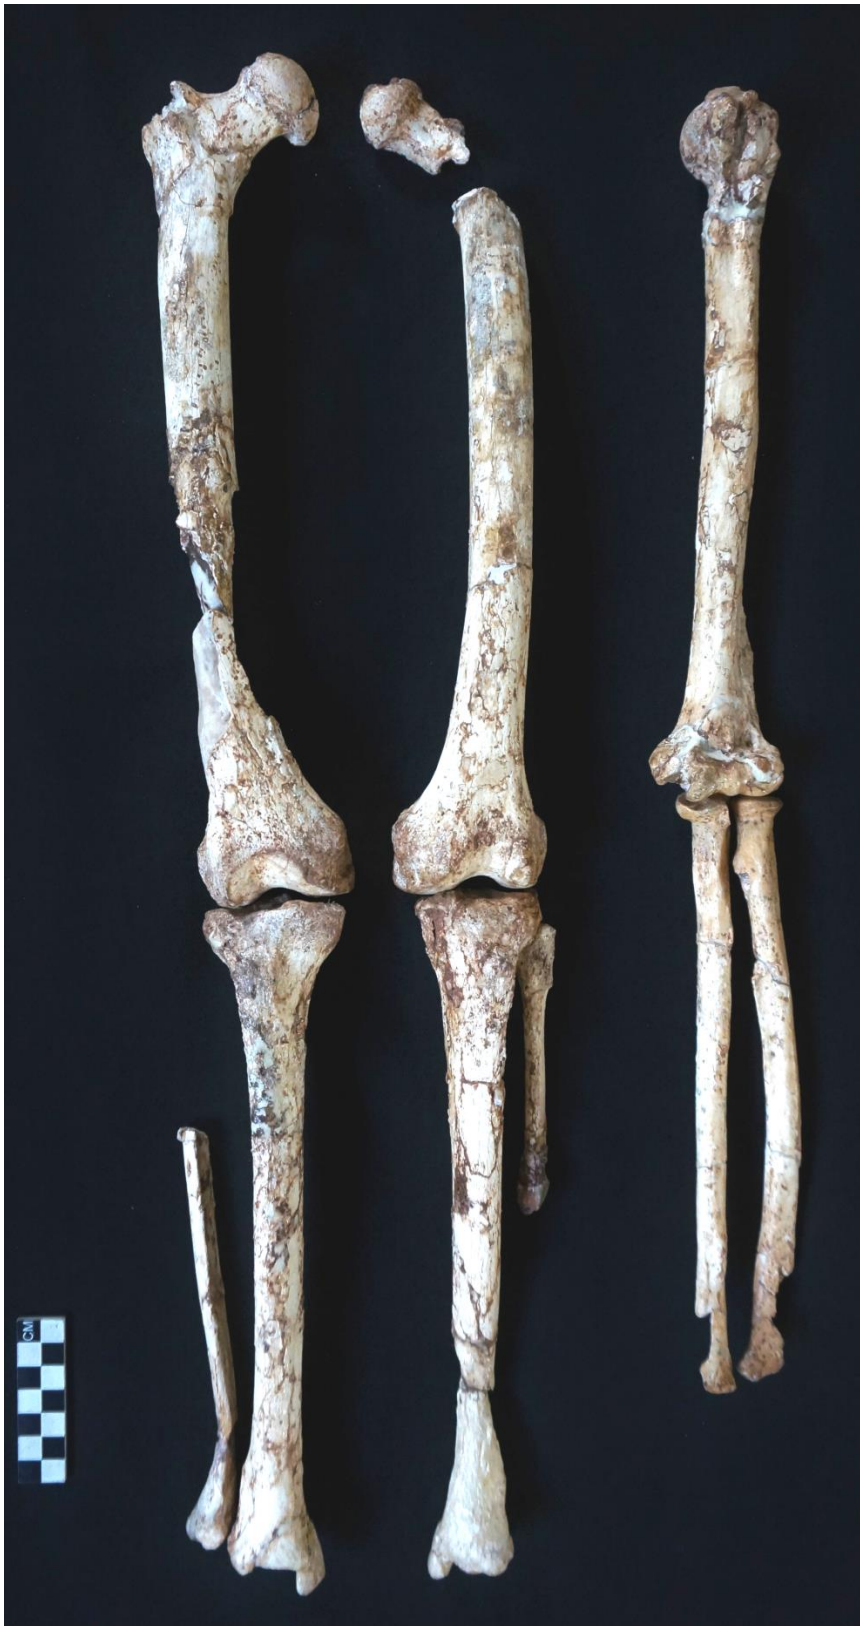

1480

1481

1482 Figure 24 Archival image of an indigenous arboreal forager climbing a thin vine using flexed  
1483 elbow postures and hallucal grasp (courtesy of Kirk Endicott)  
1484

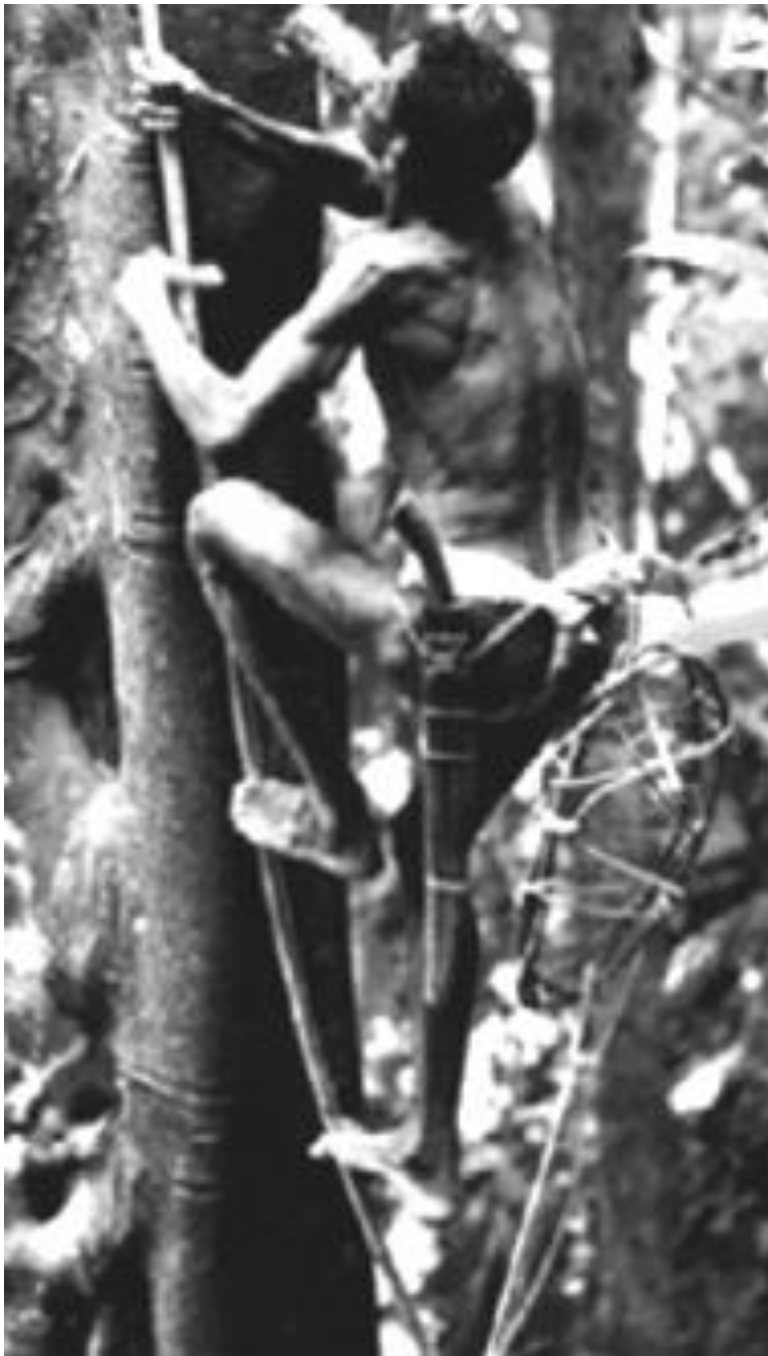

1485

1486

1487

1488

1489

1490 Figure 25: An indigenous Batek arboreal forager demonstrating his hallucal grasp for  
1491 climbing a small vine (video frame, courtesy of Vivek Venkataraman)

1492

1493

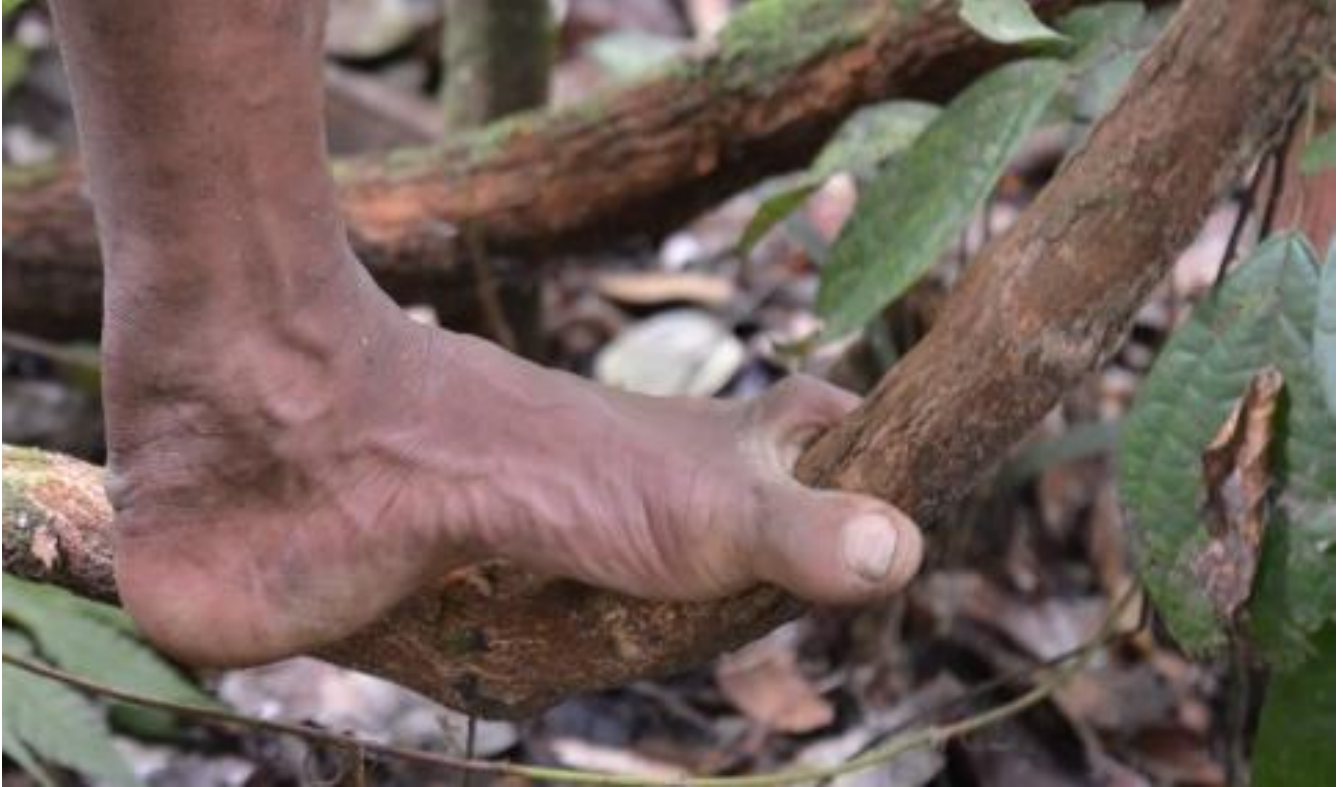

1494

1495

1496

1497

1498 Figure 26: Frames from the official video (['Drawin' on Darwin' - Live drawing created at the](#)  
1499 [Meeting of the Primate Society of Great Britain | Saranjit Birdi | Axisweb](#)) of: Top, the artist  
1500 Saranjit Birdi drawing with his foot Bottom: closeup to show precision of hallucal grasp  
1501 (courtesy of Emily Saunders and the artist);

1502

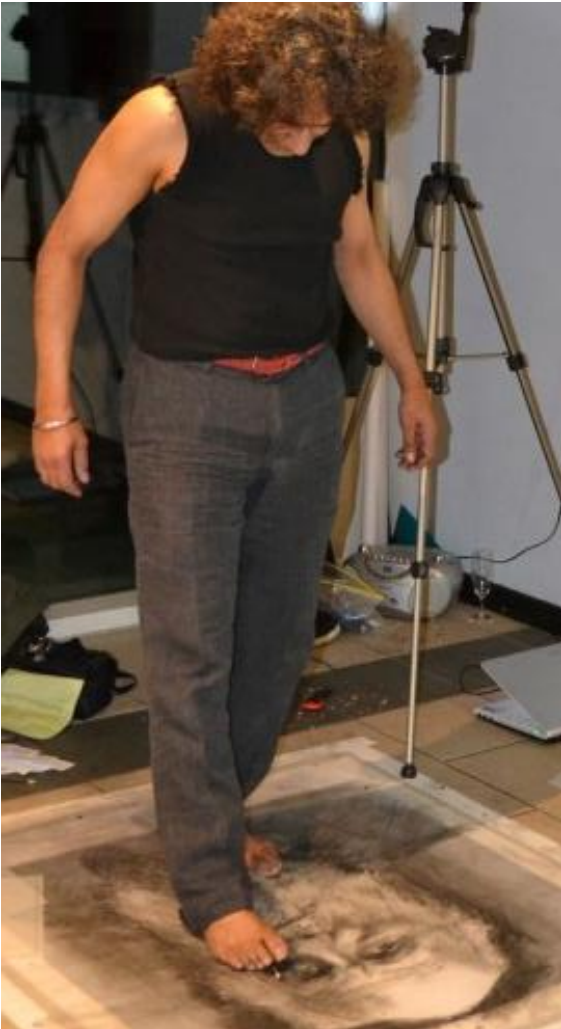

1503

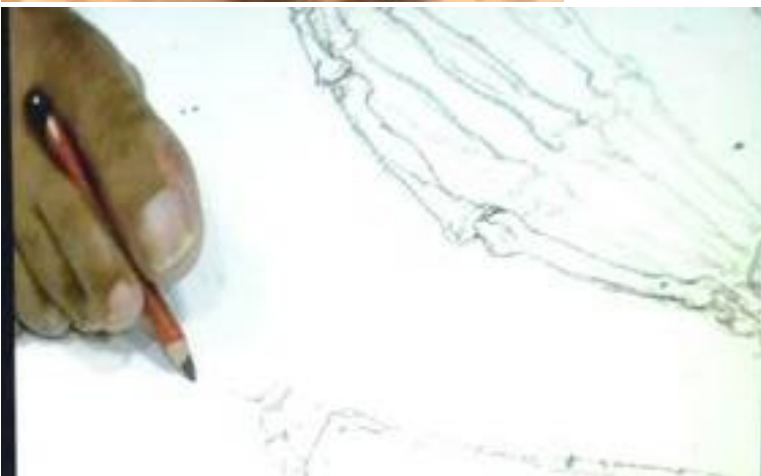

1504

1505



1506 Figure 27: Video frame of a parkour athlete brachiating on an I-beam, demonstrating the  
1507 plasticity of human finger capabilities (see Halsey et al. 2017, permission of the subject and  
1508 courtesy Susannah K.S. Thorpe)

1509

1510

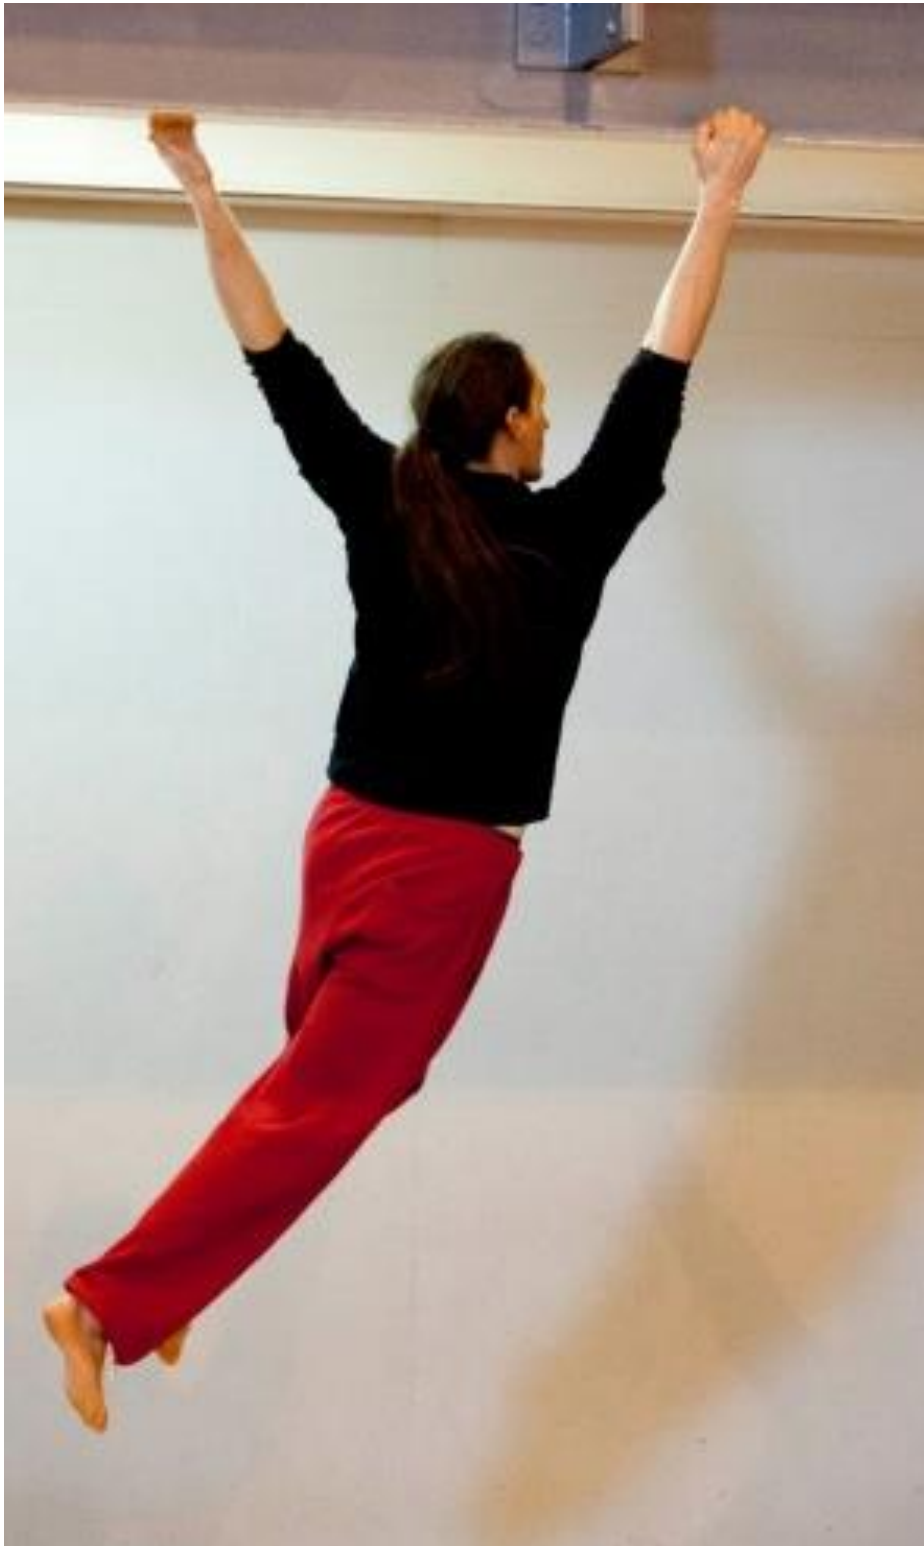

1511

1512 Figure 28: Handbones of StW 573

1513

1514

1515

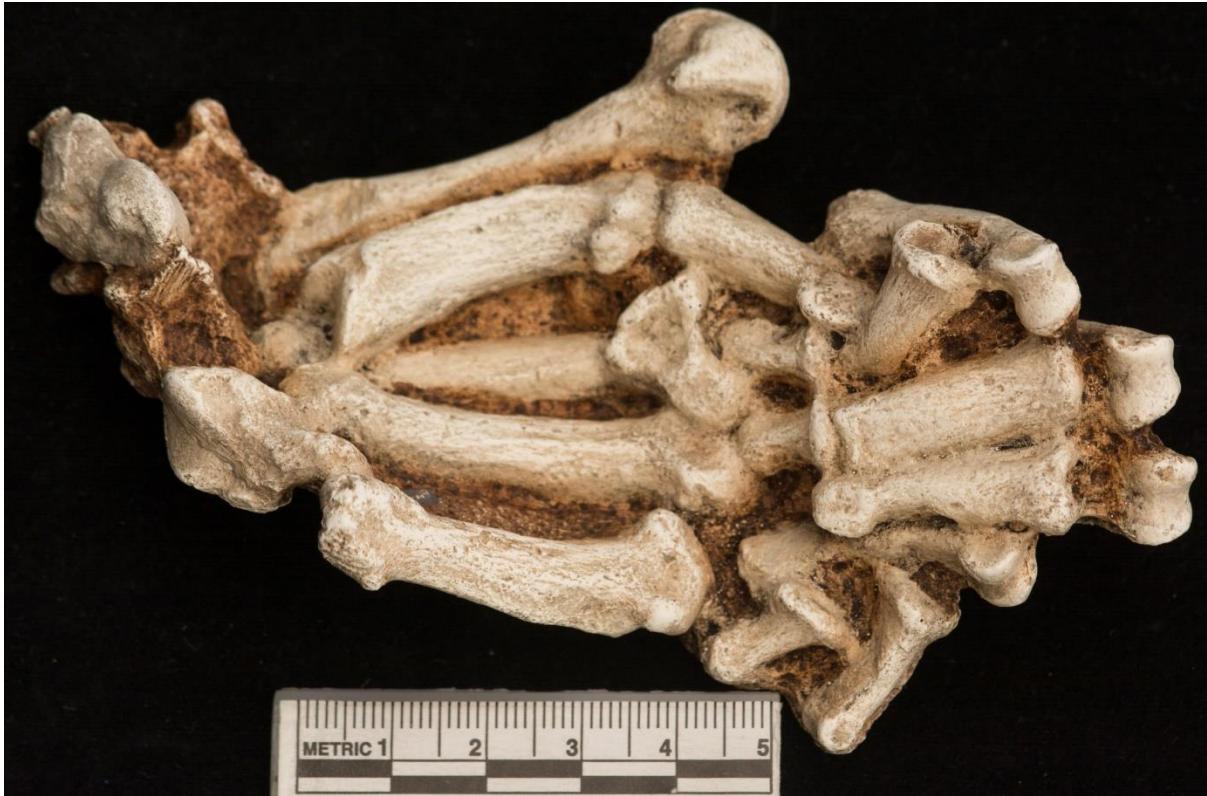

1516

1517

1518 Figure 29: Apical ridge on the trapezium of: left *Gorilla gorilla beringei*, right StW 573  
1519 (originals)

1520

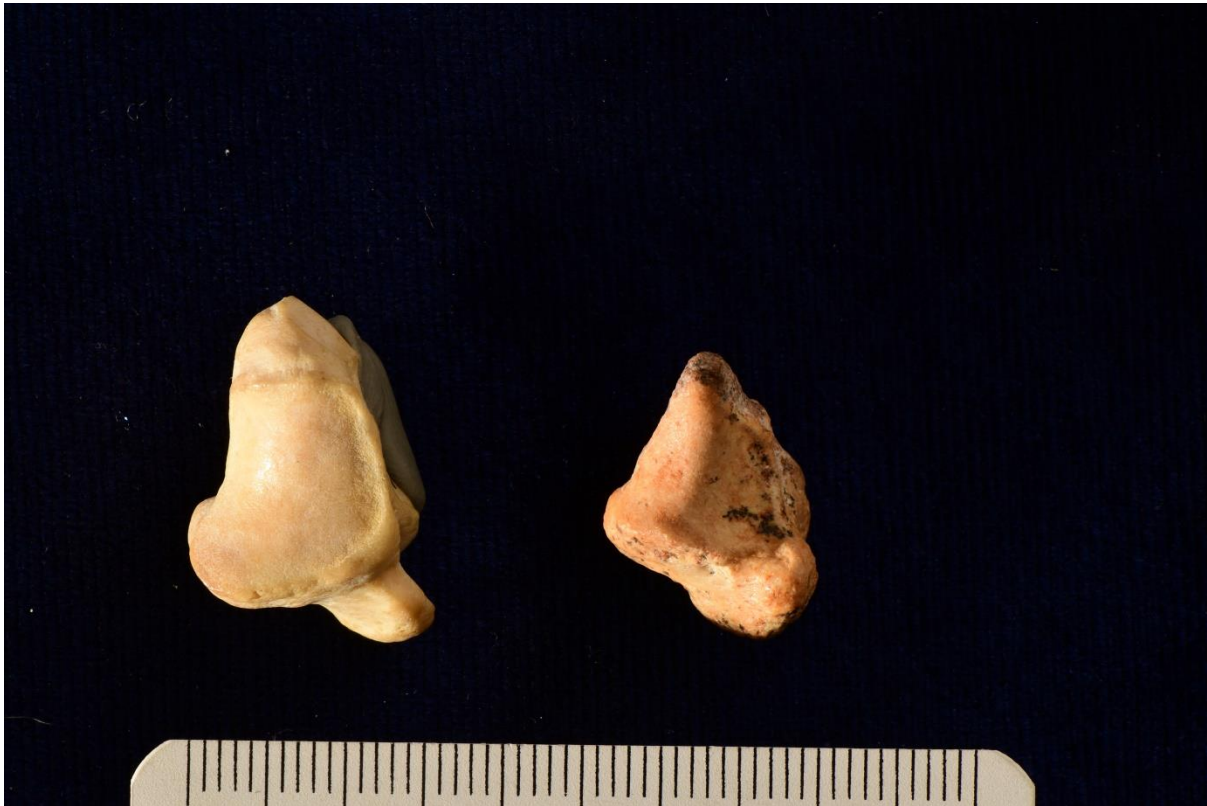

1521
